# Supplementary material for: Complete decoding of TAL effectors for DNA recognition
Source: PubMed Central journal article supplement — Cell Res. 2014 Feb 11;24(5):628–31. doi: 10.1038/cr.2014.19 (PMC4011339; doi:10.1038/cr.2014.19), 2014-02-11
Supplement: cr201419x1.pdf [file cr201419x1.pdf]

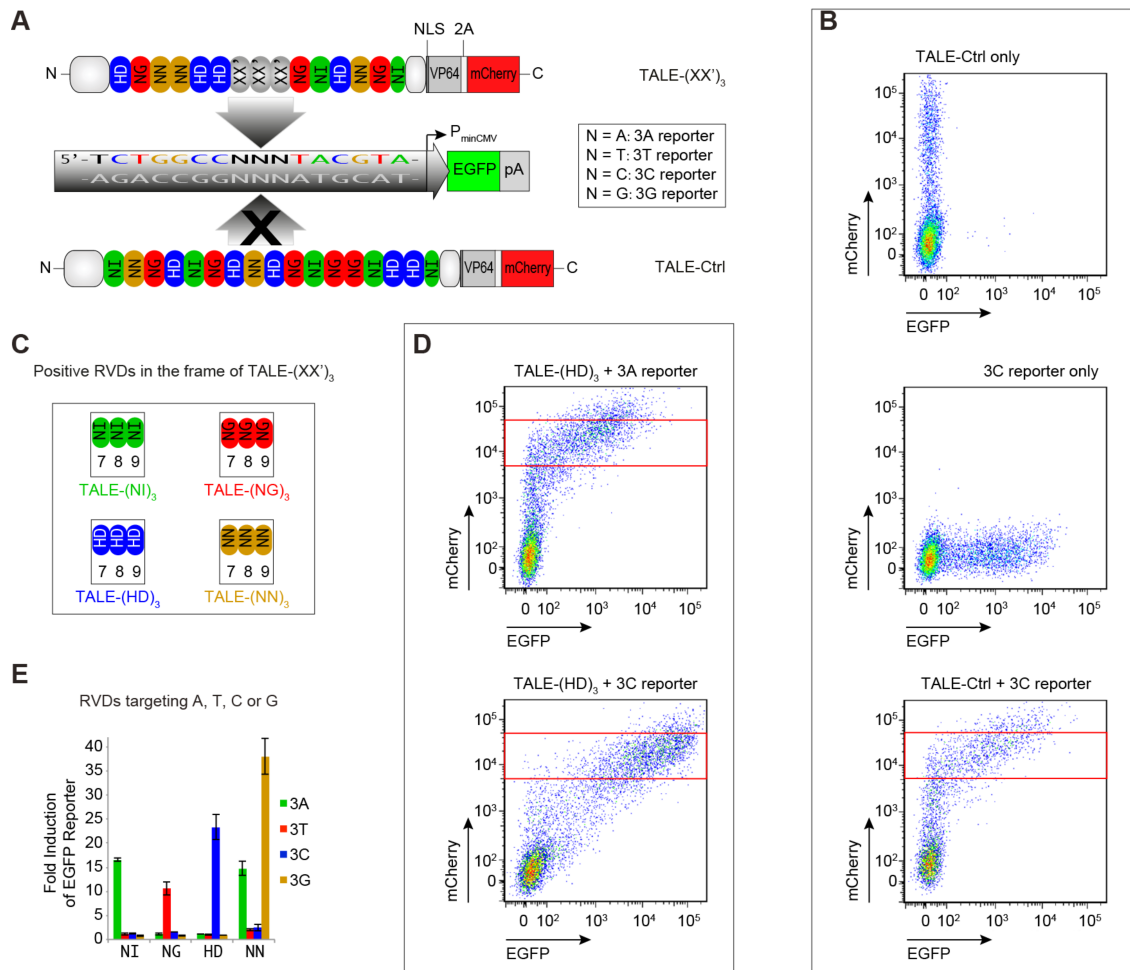

**Supplementary information, Figure S1** Screening system for the assessment of TALE RVD efficiencies and specificities. **(A)** Design of the screening system for novel TALE RVDs. The customized TALEs used for RVD screening contained 14.5 repeats fused with the VP64 trans-activation domain and 2A peptide-linked mCherry. The variable diresidues (XX') for testing were placed in the 7<sup>th</sup> - 9<sup>th</sup> repeat modules, and the customized TALE was designated as TALE-(XX')<sub>3</sub>. X and X' represents the 12<sup>th</sup> and 13<sup>th</sup> amino acids in the 7<sup>th</sup> - 9<sup>th</sup> repeat modules, respectively. To determine the DNA recognition specificity of variable RVDs, four reporters were constructed, consisting of TALE-(XX')<sub>3</sub> binding sites with three consecutive nucleotides (A, T, C or G) substituted at positions 7 - 9 in front of a minimal CMV promoter (P<sub>minCMV</sub>) and its downstream EGFP gene. Construct encoding TALE-Ctrl has the identical backbone as TALE-(XX')<sub>3</sub> except that its TALE repeat region is different

as indicated, which does not match with any reporters. **(B)** FACS analysis of HEK293T cells transfected with TALE-Ctrl only, 3C reporter only and TALE-Ctrl plus 3C reporter (from top to bottom). Red box indicates the region of data collection. **(C)** Customized TALE-(XX')<sub>3</sub> for testing the DNA binding activity of commonly used RVDs (NI, NG, HD and NN). **(D)** Representative FACS analysis of HEK293T cells co-transfected with TALE-(HD)<sub>3</sub> and the 3A (top) or 3C reporter (bottom). Red boxes indicate the region of data collection. **(E)** Base binding activity of the common RVDs in **(C)**. The horizontal axis labels indicate the variable RVD (XX') for testing in TALE-(XX')<sub>3</sub>. The color-coded bars represent the fold induction levels of the different reporters (A, green; T, red; C, blue; and G, yellow) in this and the subsequent figures. Data are means ± s.d., n = 3.
