# Supplementary material for: Complete decoding of TAL effectors for DNA recognition
Source: PubMed Central journal article supplement — Cell Res. 2014 Feb 11;24(5):628–31. doi: 10.1038/cr.2014.19 (PMC4011339; doi:10.1038/cr.2014.19), 2014-02-11
Supplement: cr201419x4.pdf [file cr201419x4.pdf]

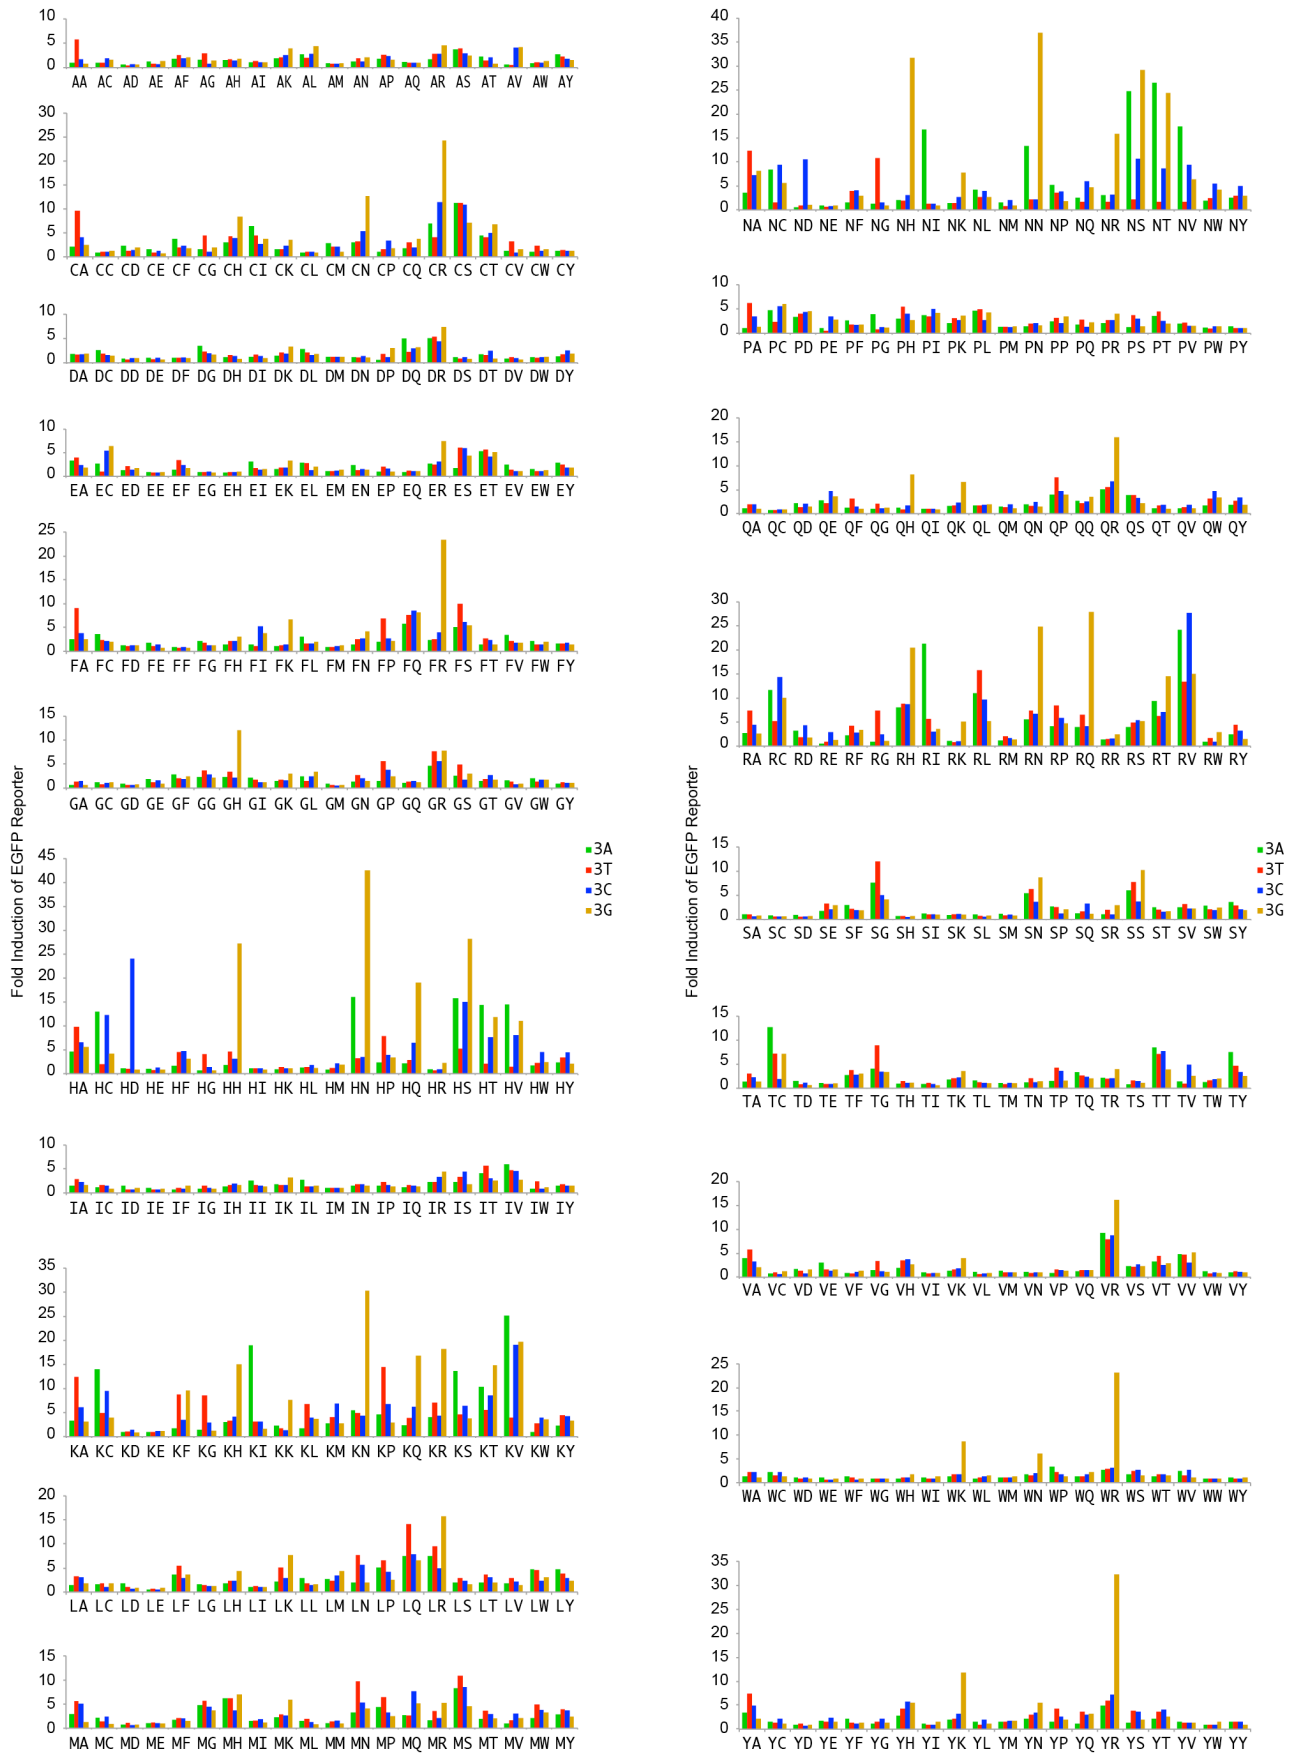

**Supplementary information, Figure S4** Base preference of 400 RVDs from the screening of the TALE-(XX')<sub>3</sub> library. The data points are the same as those in Figure 1B and Figure S3. The fold induction of the EGFP reporter of all 400 types of TALE-(XX')<sub>3</sub> (corresponding to the four reporters) was categorized by the 12<sup>th</sup> residue (X), and the data are listed in alphabetical order according to the 13<sup>th</sup> residue (X') of the variable RVD-carrying TALE. The x-axis labels indicate the variable RVDs (XX') tested in TALE-(XX')<sub>3</sub>.
