# Supplementary material for: Complete decoding of TAL effectors for DNA recognition
Source: PubMed Central journal article supplement — Cell Res. 2014 Feb 11;24(5):628–31. doi: 10.1038/cr.2014.19 (PMC4011339; doi:10.1038/cr.2014.19), 2014-02-11
Supplement: cr201419x5.pdf [file cr201419x5.pdf]

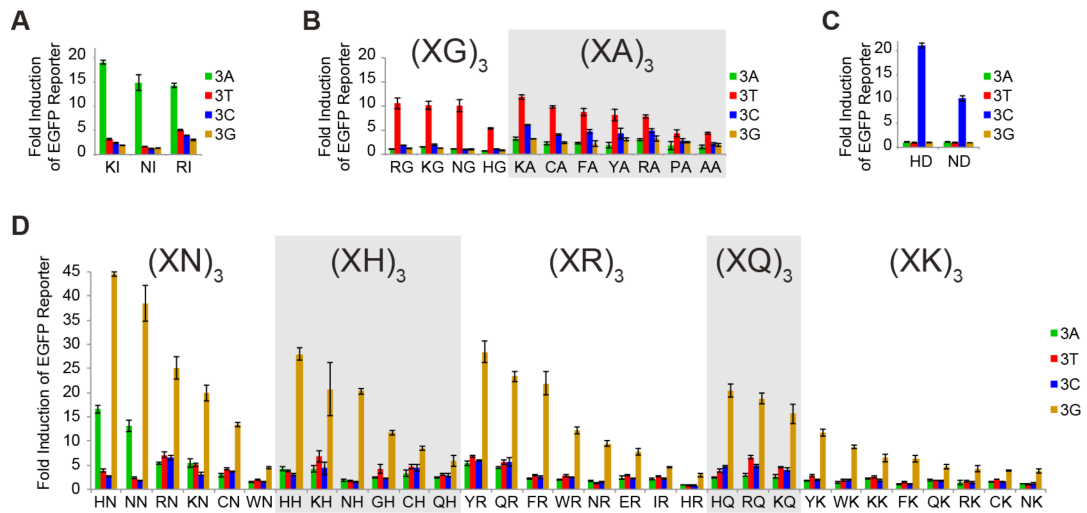

**Supplementary information, Figure S5** Base preferences of RVDs. RVDs were clustered by position 13 (X') of the variable RVDs and ranked by fold induction of EGFP in the corresponding reporter construct. The x-axis labels indicate the variable RVDs tested. Data are means  $\pm$  s.d., n = 3. **(A)** Adenine-targeting RVDs. **(B)** Thymine-targeting RVDs. **(C)** Cytosine-targeting RVDs. **(D)** Guanine-targeting RVDs.
