# Supplementary material for: Complete decoding of TAL effectors for DNA recognition
Source: PubMed Central journal article supplement — Cell Res. 2014 Feb 11;24(5):628–31. doi: 10.1038/cr.2014.19 (PMC4011339; doi:10.1038/cr.2014.19), 2014-02-11
Supplement: cr201419x6.pdf [file cr201419x6.pdf]

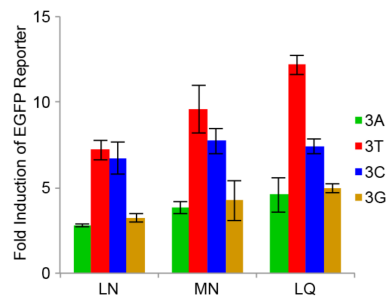

**Supplementary information, Figure S6** Base preference of RVDs in TALE-(XX')<sub>3</sub>. The x-axis labels indicate the variable RVDs tested in TALE-(XX')<sub>3</sub>. Data are means ± s.d., n = 3.
