# Supplementary material for: Complete decoding of TAL effectors for DNA recognition
Source: PubMed Central journal article supplement — Cell Res. 2014 Feb 11;24(5):628–31. doi: 10.1038/cr.2014.19 (PMC4011339; doi:10.1038/cr.2014.19), 2014-02-11
Supplement: cr201419x9.pdf [file cr201419x9.pdf]

**Supplementary information, Table S2.** Sequences of amino acid diresidues in RVDlibraries (TALE-(XX')<sub>3</sub>, TALE-(XX')<sub>6</sub> and TALE-(XX')<sub>12</sub>).

| Amino Acid (XX') | DNA (NNNNNN) |
|------------------|--------------|------------------|--------------|------------------|--------------|------------------|--------------|------------------|--------------|
| AA               | gctgcg       | CA               | tgcgcc       | DA               | gacgct       | EA               | gaggcg       | FA               | ttgccc       |
| AC               | gcctgc       | CC               | tgctgc       | DC               | gattgc       | EC               | gaatgt       | FC               | ttctgc       |
| AD               | gccgac       | CD               | tgcgac       | DD               | gacgac       | ED               | gaagac       | FD               | ttcgac       |
| AE               | gccgaa       | CE               | tgcgag       | DE               | gacgaa       | EE               | gaggag       | FE               | ttcgag       |
| AF               | gccttc       | CF               | tgcttt       | DF               | gatttc       | EF               | gagttc       | FF               | ttcttc       |
| AG               | gctggt       | CG               | tgcggt       | DG               | gatggc       | EG               | gagggc       | FG               | ttcgga       |
| AH               | gcccac       | CH               | tgccat       | DH               | gatcac       | EH               | gagcac       | FH               | tttcat       |
| AI               | gccatc       | CI               | tgtatc       | DI               | gacatt       | EI               | gaaatc       | FI               | tttatt       |
| AK               | gccaag       | CK               | tgcaag       | DK               | gacaag       | EK               | gaaaag       | FK               | ttcaag       |
| AL               | gcccta       | CL               | tgcttg       | DL               | gacctc       | EL               | gaactc       | FL               | ttcttg       |
| AM               | gccatg       | CM               | tgtatg       | DM               | gatatg       | EM               | gaaatg       | FM               | tttatg       |
| AN               | gccaac       | CN               | tgcaac       | DN               | gacaac       | EN               | gagaac       | FN               | ttcaat       |
| AP               | gcccc        | CP               | tgccca       | DP               | gacccc       | EP               | gagcct       | FP               | ttcccc       |
| AQ               | gcccga       | CQ               | tgccag       | DQ               | gaccga       | EQ               | gagcag       | FQ               | ttccga       |
| AR               | gctcgt       | CR               | tgccgg       | DR               | gatcgt       | ER               | gaacga       | FR               | ttccgg       |
| AS               | gcatcg       | CS               | tgctcg       | DS               | gactct       | ES               | gaatcc       | FS               | ttctct       |
| AT               | gccacc       | CT               | tgactc       | DT               | gacact       | ET               | gaaacc       | FT               | ttcacc       |
| AV               | gctgtc       | CV               | tgtgtc       | DV               | gacggt       | EV               | gaggtc       | FV               | ttcgtg       |
| AW               | gcgtgg       | CW               | tgttgg       | DW               | gactgg       | EW               | gaatgg       | FW               | ttctgg       |
| AY               | gcgtat       | CY               | tgctat       | DY               | gactat       | EY               | gaatac       | FY               | ttctat       |
| GA               | ggggca       | HA               | cacgcc       | IA               | atcgcg       | KA               | aaggcc       | LA               | ttggct       |
| GC               | ggctgc       | HC               | cactgc       | IC               | atctgt       | KC               | aagtgc       | LC               | ctatgc       |
| GD               | ggcgac       | HD               | cacgac       | ID               | atcgac       | KD               | aaggat       | LD               | ctcgac       |
| GE               | ggcgag       | HE               | cacgag       | IE               | atcgaa       | KE               | aaggaa       | LE               | ttggag       |
| GF               | gggttc       | HF               | cacttc       | IF               | atcttt       | KF               | aagttt       | LF               | ctgttc       |
| GG               | ggtggc       | HG               | cacggc       | IG               | atcggc       | KG               | aagggc       | LG               | ctcggc       |
| GH               | ggccac       | HH               | caccac       | IH               | atccat       | KH               | aaacat       | LH               | cttcac       |
| GI               | ggcatc       | HI               | cacatc       | II               | attatc       | KI               | aagatc       | LI               | ctcatt       |
| GK               | ggcaag       | HK               | cacaag       | IK               | attaag       | KK               | aaaaag       | LK               | ctcaaa       |
| GL               | ggcctc       | HL               | cacctg       | IL               | atcttg       | KL               | aagctc       | LL               | cttctc       |
| GM               | ggtatg       | HM               | cacatg       | IM               | atcatg       | KM               | aagatg       | LM               | ctcatg       |
| GN               | ggcaac       | HN               | cacaac       | IN               | atcaac       | KN               | aagaac       | LN               | ctcaat       |
| GP               | ggtccc       | HP               | cacccc       | IP               | atcccc       | KP               | aagcct       | LP               | cttccc       |
| GQ               | ggccag       | HQ               | caccag       | IQ               | atccag       | KQ               | aagcag       | LQ               | ctccag       |
| GR               | ggtcgc       | HR               | cacaga       | IR               | atccgt       | KR               | aaacgc       | LR               | ttgcgc       |
| GS               | ggctcc       | HS               | cacagc       | IS               | atcagc       | KS               | aagtct       | LS               | ctctct       |
| GT               | ggcacc       | HT               | cacacc       | IT               | ataacc       | KT               | aagacc       | LT               | ttgact       |
| GV               | ggcgtc       | HV               | cacgtg       | IV               | atcgtc       | KV               | aaggtt       | LV               | ctgggt       |
| GW               | ggttgg       | HW               | cactgg       | IW               | atctgg       | KW               | aagtgg       | LW               | atttgg       |
| GY               | ggctac       | HY               | cactac       | IY               | atctat       | KY               | aagtac       | LY               | ctctac       |

| Amino Acid (XX') | DNA (NNNNNN) |
|------------------|--------------|------------------|--------------|------------------|--------------|------------------|--------------|------------------|--------------|
| MA               | atggcg       | NA               | aacgcc       | PA               | ccagcc       | QA               | caggct       | RA               | agagct       |
| MC               | atgtgc       | NC               | aactgc       | PC               | ccctgt       | QC               | cagtgc       | RC               | cgctgc       |
| MD               | atggat       | ND               | aacgac       | PD               | cctgac       | QD               | caggac       | RD               | agggac       |
| ME               | atggaa       | NE               | aacgag       | PE               | ccagaa       | QE               | caggag       | RE               | agagag       |
| MF               | atgttt       | NF               | aacttc       | PF               | ccattt       | QF               | caattt       | RF               | aggttt       |
| MG               | atgggc       | NG               | aacggc       | PG               | ccgggg       | QG               | cagggt       | RG               | cgcggc       |
| MH               | atgcac       | NH               | aaccac       | PH               | ccgcat       | QH               | caacat       | RH               | agacac       |
| MI               | atgata       | NI               | aacatc       | PI               | ccaatc       | QI               | cagatc       | RI               | agaatc       |
| MK               | atgaag       | NK               | aacaag       | PK               | cctaag       | QK               | cagaag       | RK               | cgcaag       |
| ML               | atgtta       | NL               | aacctg       | PL               | ccgctc       | QL               | caactt       | RL               | cgctc        |
| MM               | atgatg       | NM               | aacatg       | PM               | cccatg       | QM               | cagatg       | RM               | agaatg       |
| MN               | atgaac       | NN               | aacaac       | PN               | cctaac       | QN               | cagaac       | RN               | cgtaac       |
| MP               | atgccc       | NP               | aacccc       | PP               | ccccc        | QP               | caacct       | RP               | cgccc        |
| MQ               | atgcag       | NQ               | aaccag       | PQ               | ccgcag       | QQ               | cagcaa       | RQ               | agacag       |
| MR               | atgcgg       | NR               | aacaga       | PR               | cctcgt       | QR               | caacgt       | RR               | cgcgga       |
| MS               | atgtcc       | NS               | aacagc       | PS               | ccttcg       | QS               | caatcc       | RS               | cgctcc       |
| MT               | atgact       | NT               | aacacc       | PT               | ccgacg       | QT               | cagact       | RT               | cgcacc       |
| MV               | atggtc       | NV               | aacgtg       | PV               | cctgtg       | QV               | cagggt       | RV               | cggtt        |
| MW               | atgtgg       | NW               | aactgg       | PW               | ccgtgg       | QW               | cagtgg       | RW               | cgctgg       |
| MY               | atgtat       | NY               | aactac       | PY               | ccatac       | QY               | cagtat       | RY               | agatac       |
| SA               | tccgcc       | TA               | actgcc       | VA               | gtcgcc       | WA               | tgggcc       | YA               | tacgcg       |
| SC               | tcctgc       | TC               | acctgc       | VC               | gtatgc       | WC               | tgggtc       | YC               | tactgt       |
| SD               | tcggat       | TD               | accgac       | VD               | gtggac       | WD               | tgggat       | YD               | tacgat       |
| SE               | tccgaa       | TE               | accgag       | VE               | gttgag       | WE               | tgggaa       | YE               | tatgaa       |
| SF               | agcttt       | TF               | acgttc       | VF               | gtgttc       | WF               | tggttt       | YF               | tacttc       |
| SG               | tcgggg       | TG               | actggc       | VG               | gtcgga       | WG               | tggggc       | YG               | tatggc       |
| SH               | tcacac       | TH               | aaccac       | VH               | gtgcat       | WH               | tggcat       | YH               | tatcac       |
| SI               | agcatc       | TI               | accatc       | VI               | gtcatt       | WI               | tggatc       | YI               | tacatt       |
| SK               | tccaag       | TK               | accaag       | VK               | gtcaag       | WK               | tggaag       | YK               | tacaag       |
| SL               | tcctc        | TL               | actctc       | VL               | gtcttg       | WL               | tggttg       | YL               | tactta       |
| SM               | agcatg       | TM               | accatg       | VM               | gtcatg       | WM               | tggatg       | YM               | tatatg       |
| SN               | tccaac       | TN               | accaac       | VN               | gtgaac       | WN               | tggaac       | YN               | tacaac       |
| SP               | tccccg       | TP               | acacca       | VP               | gtccct       | WP               | tggccg       | YP               | tatccg       |
| SQ               | tcgcaa       | TQ               | accaa        | VQ               | gtgcag       | WQ               | tggcag       | YQ               | taccag       |
| SR               | tcgagg       | TR               | accgc        | VR               | gtgcgg       | WR               | tggcgc       | YR               | tatcga       |
| SS               | tctagc       | TS               | acatcc       | VS               | gtgtcc       | WS               | tggtcg       | YS               | tattcc       |
| ST               | tctacc       | TT               | actacg       | VT               | gtgacc       | WT               | tggact       | YT               | tatact       |
| SV               | tccgtg       | TV               | acggtc       | VV               | gttgtt       | WV               | tgggtt       | YV               | tacgtt       |
| SW               | tcctgg       | TW               | acttgg       | VW               | gtgtgg       | WW               | tggtag       | YW               | tactgg       |
| SY               | agttac       | TY               | acttac       | VY               | gtctac       | WY               | tggtag       | YY               | tactat       |
