# Supplementary material for: Complete decoding of TAL effectors for DNA recognition
Source: PubMed Central journal article supplement — Cell Res. 2014 Feb 11;24(5):628–31. doi: 10.1038/cr.2014.19 (PMC4011339; doi:10.1038/cr.2014.19), 2014-02-11
Supplement: cr201419x10.pdf [file cr201419x10.pdf]

**Supplementary information, Table S3.** Base binding specificity of previously reported RVDs obtained from TALE-(XX')<sub>3</sub> library screening.

| Category | RVDs | A    | T  | C    | G    |
|----------|------|------|----|------|------|
| NX'      | NA   | -    | ++ | +    | +    |
|          | NC   | +    | -  | +    | -    |
|          | ND   | -    | -  | +    | -    |
|          | NG   | -    | +  | -    | -    |
|          | NH   | -    | -  | -    | ++++ |
|          | NI   | ++   | -  | -    | -    |
|          | NK   | -    | -  | -    | +    |
|          | NN   | ++   | -  | -    | ++++ |
|          | NP   | -    | -  | -    | -    |
|          | NQ   | -    | -  | +    | -    |
|          | NS   | ++++ | -  | +    | ++++ |
|          | NT   | ++++ | -  | +    | ++++ |
|          | NV   | ++   | -  | +    | +    |
| HX'      | HA   | -    | +  | +    | -    |
|          | HD   | -    | -  | ++++ | -    |
|          | HG   | -    | -  | -    | -    |
|          | HH   | -    | -  | -    | ++++ |
|          | HI   | -    | -  | -    | -    |
|          | HN   | ++   | -  | -    | ++++ |
| IX'      | IG   | -    | -  | -    | -    |
|          | IS   | -    | -  | -    | -    |
| SX'      | SH   | -    | -  | -    | -    |
|          | SN   | -    | +  | -    | +    |
|          | SS   | +    | +  | -    | +    |
| YX'      | YG   | -    | -  | -    | -    |

Note:

The ranges of fold induction of EGFP reporter for RVDs in TALE-(XX')<sub>3</sub> are indicated as follows:

- < 6  
 + 6 - 12  
 ++ 12 - 18  
 +++ 18 - 24  
 ++++ ≥ 24
