# Supplementary material for: Complete decoding of TAL effectors for DNA recognition
Source: PubMed Central journal article supplement — Cell Res. 2014 Feb 11;24(5):628–31. doi: 10.1038/cr.2014.19 (PMC4011339; doi:10.1038/cr.2014.19), 2014-02-11
Supplement: cr201419x11.pdf [file cr201419x11.pdf]

## Supplementary information, Table S4. Efficiencies of TALENs-mediated indels with novel RVDs.

| Targeted Gene     | Type of TALENs                  | TALEN <sup>L</sup>                                                                            | TALEN <sup>R</sup>                                                                     | Mean Indels (%)<br>± s.d. (n = 3) |
|-------------------|---------------------------------|-----------------------------------------------------------------------------------------------|----------------------------------------------------------------------------------------|-----------------------------------|
| LRP1 <sup>a</sup> | TALEN <sup>S<sub>NN</sub></sup> | NI NI <b>NN</b> NI HD NG NG <b>NN</b> HD NI <b>NN</b> HD HD HD HD                             | NI HD NI <b>NN</b> <b>NN</b> NG NG NI NG NG NG <b>NN</b> NI NG HD                      | 77.1 ± 4.3                        |
|                   | TALEN <sup>S<sub>NH</sub></sup> | NI NI <b>NH</b> NI HD NG NG <b>NH</b> HD NI <b>NH</b> HD HD HD HD                             | NI HD NI <b>NH</b> <b>NH</b> NG NG NI NG NG NG <b>NH</b> NI NG HD                      | 50.7 ± 4.9                        |
|                   | TALEN <sup>S<sub>KN</sub></sup> | NI NI <b>KN</b> NI HD NG NG <b>KN</b> HD NI <b>KN</b> HD HD HD HD                             | NI HD NI <b>KN</b> <b>KN</b> NG NG NI NG NG NG <b>KN</b> NI NG HD                      | 78.1 ± 3.4                        |
| DKK1 <sup>b</sup> | TALEN <sup>S<sub>NN</sub></sup> | NG HD HD NI NI HD <b>NN</b> HD NG NI NG HD NI NI <b>NN</b>                                    | <b>NN</b> HD HD HD HD <b>NN</b> HD NI <b>NN</b> HD <b>NN</b> HD HD <b>NN</b> HD        | 54.7 ± 4.8                        |
|                   | TALEN <sup>S<sub>NH</sub></sup> | NG HD HD NI NI HD <b>NH</b> HD NG NI NG HD NI NI <b>NH</b>                                    | <b>NH</b> HD HD HD HD <b>NH</b> HD NI <b>NH</b> HD <b>NH</b> HD HD <b>NH</b> HD        | 39.4 ± 7.8                        |
|                   | TALEN <sup>S<sub>KN</sub></sup> | NG HD HD NI NI HD <b>KN</b> HD NG NI NG HD NI NI <b>KN</b>                                    | <b>KN</b> HD HD HD HD <b>KN</b> HD NI <b>KN</b> HD <b>KN</b> HD HD <b>KN</b> HD        | 49.9 ± 2.7                        |
| LRP1 <sup>a</sup> | TALEN <sup>S<sub>NG</sub></sup> | NI NI NN NI HD <b>NG</b> <b>NG</b> NN HD NI NN HD HD HD HD                                    | NI HD NI NN NN <b>NG</b> <b>NG</b> NI <b>NG</b> <b>NG</b> <b>NG</b> NN NI <b>NG</b> HD | 77.1 ± 4.3                        |
|                   | TALEN <sup>S<sub>RG</sub></sup> | NI NI NN NI HD <b>RG</b> <b>RG</b> NN HD NI NN HD HD HD HD                                    | NI HD NI NN NN <b>RG</b> <b>RG</b> NI <b>RG</b> <b>RG</b> <b>RG</b> NN NI <b>RG</b> HD | 40.2 ± 10.3                       |
| ATG5 <sup>c</sup> | TALEN <sup>S<sub>NG</sub></sup> | <b>NN</b> <b>NG</b> <b>NG</b> <b>NG</b> HD NI HD NN HD <b>NG</b> NI <b>NG</b> NI <b>NG</b> HD | NI <b>NG</b> NN NN <b>NG</b> <b>NG</b> HD <b>NG</b> NN HD <b>NG</b> <b>NG</b> HD HD HD | 11.5 ± 0.6                        |
|                   | TALEN <sup>S<sub>RG</sub></sup> | <b>NN</b> <b>RG</b> <b>RG</b> <b>RG</b> HD NI HD NN HD <b>RG</b> NI <b>RG</b> NI <b>RG</b> HD | NI <b>RG</b> NN NN <b>RG</b> <b>RG</b> HD <b>RG</b> NN HD <b>RG</b> <b>RG</b> HD HD HD | 6.5 ± 0.5                         |

<sup>a</sup> Sequence for TALENs targeting is 5'-TAAGACTTGCAGCCCCAAGCAGTTTGCCTGCAGAGATCAAATAACCTGTA-3', and TALEN<sup>L</sup> and TALEN<sup>R</sup> targeted regions are labeled in grey shades. Sequences of primers used to amplify the TALENs targeting region for the assessment of indels are: 5'-AGCCTAGAGGACTTGGAGGG-3' and 5'-ACCTGGGCAATCATCAAG-3'.

<sup>b</sup> Sequence for TALENs targeting is 5'-TTCCAACGCTATCAAGAACCTGCCCCACCGCTGGGCGGCGCTGCGGGGCA-3', and TALEN<sup>L</sup> and TALEN<sup>R</sup> targeted regions are labeled in grey shades. Sequences of primers used to amplify the TALENs targeting region for the assessment of indels are: 5'-GACCCAGGCTTGCAAAGTGA-3' and 5'-CAGGCGAGACAGATTTGCAC-3'.

<sup>c</sup> Sequence for TALENs targeting is 5'-TGTTTCACGCTATATCAGGATGAGATAACTGAAAGGGAAGCAGAACCATA-3', and TALEN<sup>L</sup> and TALEN<sup>R</sup> targeted regions are labeled in grey shades. Sequences of primers used to amplify the TALENs targeting region for the assessment of indels are: 5'-TAGCAGGTTTCATTCATCGTTGCAAGGA-3' and 5'-ATGTAAGGAAAACAAAGTCCAGAACGC-3'.
