# Supplementary material for: Complete decoding of TAL effectors for DNA recognition
Source: PubMed Central journal article supplement — Cell Res. 2014 Feb 11;24(5):628–31. doi: 10.1038/cr.2014.19 (PMC4011339; doi:10.1038/cr.2014.19), 2014-02-11
Supplement: cr201419x12.pdf [file cr201419x12.pdf]

**Supplementary information, Table S5.**

RVDs targeting multiple bases.

## RVDs targeting two bases

| Category | RVDs | A  | T  | C  | G    |
|----------|------|----|----|----|------|
| A/T      | SG   | +  | +  | -  | -    |
| A/C      | HC   | ++ | -  | ++ | -    |
|          | KC   | ++ | -  | ++ | -    |
|          | NC   | +  | -  | +  | -    |
|          | KS   | ++ | -  | +  | -    |
| A/G      | HN   | ++ | -  | -  | ++++ |
|          | NN   | ++ | -  | -  | ++++ |
| T/C      | HA   | -  | +  | +  | -    |
|          | KA   | -  | ++ | +  | -    |
|          | KP   | -  | ++ | +  | -    |
|          | FS   | -  | +  | +  | -    |
| T/G      | KF   | -  | +  | -  | +    |
|          | SN   | -  | +  | -  | +    |
|          | RQ   | -  | +  | -  | ++++ |
|          | GR   | -  | +  | -  | +    |
| C/G      | KR   | -  | +  | -  | +++  |
|          | HQ   | -  | -  | +  | +++  |
|          | KQ   | -  | -  | +  | ++   |
|          | QR   | -  | -  | +  | ++   |
|          | YR   | -  | -  | +  | ++++ |

## RVDs targeting four bases

| Category | RVDs | A   | T  | C   | G   |
|----------|------|-----|----|-----|-----|
| A/T/C/G  | RH   | +   | +  | +   | +++ |
|          | LQ   | +   | ++ | +   | +   |
|          | VR   | +   | +  | +   | ++  |
|          | CS   | +   | +  | +   | +   |
|          | RT   | +   | +  | +   | ++  |
|          | RV   | +++ | ++ | +++ | ++  |

Note:

The ranges of fold induction of EGFP reporter for RVDs in TALE-(XX')<sub>3</sub> are indicated as follows:

|      |         |
|------|---------|
| -    | < 6     |
| +    | 6 - 12  |
| ++   | 12 - 18 |
| +++  | 18 - 24 |
| ++++ | ≥ 24    |

## RVDs targeting three bases

| Category | RVDs | A    | T  | C   | G    |
|----------|------|------|----|-----|------|
| A/T/C    | RL   | +    | ++ | +   | -    |
|          | MS   | +    | +  | +   | -    |
|          | TT   | +    | +  | +   | -    |
| A/T/G    | TC   | ++   | +  | -   | +    |
|          | MH   | +    | +  | -   | +    |
|          | LR   | +    | +  | -   | ++   |
|          | SS   | +    | +  | -   | +    |
| A/C/G    | RC   | +    | -  | ++  | +    |
|          | CR   | +    | -  | +   | +++  |
|          | HS   | ++   | -  | ++  | ++++ |
|          | NS   | ++++ | -  | +   | ++++ |
|          | HT   | ++   | -  | +   | +    |
|          | KT   | +    | -  | +   | ++   |
|          | NT   | ++++ | -  | +   | ++++ |
|          | HV   | ++   | -  | +   | +    |
|          | KV   | ++++ | -  | +++ | +++  |
|          | NV   | ++   | -  | +   | +    |
| T/C/G    | FQ   | -    | +  | +   | +    |
|          | NA   | -    | ++ | +   | +    |
|          | RN   | -    | +  | +   | ++++ |

## SUPPLEMENTARY REFERENCES

1. Zhang, F. et al. Efficient construction of sequence-specific TAL effectors for modulating mammalian transcription. *Nature biotechnology* **29**, 149-153 (2011).
2. Yang, J. et al. ULtiMATE system for rapid assembly of customized TAL effectors. *PLoS One* **8**, e75649 (2013).
3. Boussif, O. et al. A versatile vector for gene and oligonucleotide transfer into cells in culture and in vivo: polyethylenimine. *Proc Natl Acad Sci U S A* **92**, 7297-7301 (1995).
4. Mussolino, C. et al. A novel TALE nuclease scaffold enables high genome editing activity in combination with low toxicity. *Nucleic acids research* (2011).
