# Supplementary material for: Complete decoding of TAL effectors for DNA recognition
Source: PubMed Central journal article supplement — Cell Res. 2014 Feb 11;24(5):628–31. doi: 10.1038/cr.2014.19 (PMC4011339; doi:10.1038/cr.2014.19), 2014-02-11
Supplement: cr201419x13.pdf [file cr201419x13.pdf]

## Supplementary information, Data S1 Sequences and material and methods

## TALE-Ctrl

1 GTCGACGGATCGGGAGATCTCCCATCCCCTATGGTGCACCTCTCAGTACAATCTGCTCTG  
 61 ATGCCGCATAGTTAAGCCAGTATCTGCTCCCCTGCTTGTGTGTTGGAGGTCGCTGAGTAGT  
 121 GCGCGAGCAAAATTTAAGCTACAACAAGGCAAGGCTTGACCACAATTGCATGAAGAATC  
 181 TGCTTAGGGTTAGGCGTTTTGCGCTGCTTCGCGATGTACGGGCCAGATATACGCGTTGAC  
 241 ATTGATTATTGACTAGTTATTAATAGTAATCAATTACGGGGTCATTAGTTCATAGCCCAT  
 301 ATATGGAGTTCGCGGTTACATAACTTACGGTAAATGGCCCCGCTGGCTGACCGCCCAACG  
 361 ACCCCCGCCCATTTGACGTCAATAATGACGTATGTTCCCATAGTAACGCCAATAGGGACTT  
 421 TCCATTGACGTCAATGGGTGGAGTATTTACGGTAAACTGCCCACTTGGCAGTACATCAAG  
 481 TGTATCATATGCCAAGTACGCCCCCTATTGACGTCAATGACGGTAAATGGCCCCGCTGGC  
 541 ATTATGCCCAGTACATGACCTTATGGGACTTTTCCCTACTTGGCAGTACATCTACGTATTAG  
 601 TCATCGCTATTACCATGGTGATGCGGTTTTTGGCAGTACATCAATGGGCGTGGATAGCGGT  
 661 TTGACTCACGGGGATTTCCAAGTCTCCACCCCATTTGACGTCAATGGGAGTTTTGTTTTGGC  
 721 ACCAAAATCAACGGGACTTTTCCAAAATGTCGTAACAACCTCCGCCCCATTGACGCAAAATGG  
 781 GCGGTAGGCGTGTACGGTGGGAGGTCATATAAAGCAGCGCGTTTTTGCCTGTACTGGGTCT  
 841 CTCTGGTTAGACCAGATCTGAGCCTGGGAGCTCTCTGGCTAACTAGGGAACCCACTGCTT  
 901 AAGCTCAATAAAGCTTGCCCTTGAGTGCCTCAAGTAGTGTGTGCCCGTCTGTTGTGTGAC  
 961 TCTGGTAACTAGAGATCCCTCAGACCCTTTTAGTCAGTGTGAAAAATCTCTAGCAGTGGC  
 1021 GCCCGAACAGGGACTTGAAAGCGAAAGGGAAACCAGAGGAGCTCTCTCGACGCAGGACTC  
 1081 GGCTTGTGTAAGCGCGCACGGCAAGAGGCGAGGGGCGCGACTGGTGAGTACGCCAAAAA  
 1141 TTTTACTAGCGGAGGCTAGAAGGAGAGAGATGGGTGCGAGAGCGTCAGTATTAAGCGGG  
 1201 GGAGAAATTAGATCGCGATGGGAAAAAATTCGGTTAAGGCCAGGGGGAAAGAAAAAATATA  
 1261 AATTAAAACATATAGTATGGGCAAGCAGGGAGCTAGAACGATTCGCAGTTAATCCTGGCC  
 1321 TGTTAGAAACATCAGAAGGCTGTAGACAAATACTGGGACAGCTACAACCATCCCTTCA  
 1381 CAGGATCAGAAGAACTTAGATCATTATATAATACAGTAGCAACCCTCTATTGTGTGCATC  
 1441 AAAGGATAGAGATAAAAGACACCAAGGAAGCTTTAGACAAGATAGAGGAAGAGCAAAACA  
 1501 AAAGTAAGACCACCGCACAGCAAGCGGCCGGCCGCGCTGATCTTCAGACCTGGAGGAGGA  
 1561 GATATGAGGAGACAATTGGAGAAGTGAATATATAAAATATAAAGTAGTAAAAAATGAACCA  
 1621 TTAGGATGAGCACCCCAAGGCAAGGAGAAGAGAGGTTGTCAGAGAGAAAAAAGACAGTG  
 1681 GGAATAGGAGCTTTTGTTCCTTGGGTTCTTGGGAGCAGCAGGAAGCACTATGGGCGCAGCG  
 1741 TCAATGACGCTGACGGTACAGGCCAGACAATTATTGTCTGGTATAGTGCAGCAGCAGAAC  
 1801 AATTTGCTGAGGGCTATTGAGGCGCAACAGCATCTGTTGCAACTCACAGTCTGGGGCATC  
 1861 AAGCAGCTCCAGGCAAGAATCCGGCTGTGGAAAGATACCTAAAGGATCAACAGCTCCTG  
 1921 GGGATTTGGGGTTGCTCTGGAAAACCTATTTGCACCCTGCTGTGCCTTGGAAATGCTAGT  
 1981 TGGAGTAATAAATCTCTGGAACAGATTTGGAATCACACGACCTGGATGGAGTGGGACAGA  
 2041 GAAATTAACAATTACACAAGCTTAATACACTCCTTAATTAAGAATCGCAAAACCAGCAA  
 2101 GAAAAGAAATGAACAAGAATTATTGGAATTAGATAAATGGGCAAGTTTTGTGGAATTGGTTT  
 2161 AACATAACAAATTGGCTGTGGTATATAAAATTAATCATAATGATAGTAGGAGGCTTGGTA  
 2221 GGTTTAAGAATAGTTTTTGTGTACTTTCTATAGTGAATAGAGTTAGGCAGGGATATTCA  
 2281 CCATTATCGTTTTAGACCCACCTCCCAACCCCGAGGGGACCCGACAGGCCCGAAGGAATA  
 2341 GAAGAAGAAGGTGGAGAGAGACAGACAGATCCATTTCGATTGTAACGGATCGGCA  
 2401 CTGCGTGCGCCAATCTGCAGACAAATGGCAGTATTCATCCACAATTTTAAAGAAAAGG  
 2461 GGGGATTTGGGGGTACAGTGCAGGGGAAAGAATAGTAGACATAATAGCAACAGACATACA  
 2521 AACTAAAGAAATTACAAAAACAAATTACAAAAATTCAAAATTTTCGGGTTTATTACAGGGA  
 2581 CAGCAGAGATCCAGTTTGGTTAGTACCGGGCCCGCTCTAGACGATGTACGGGCCAGATAT  
 2641 ACGCGTTGACATTGATTATTGACTAGTTATTAATAGTAATCAATTACGGGGTCATTAGTT  
 2701 CATAGCCCATATATGGAGTTCGCGGTTACATAACTTACGGTAAATGGCCCCGCTGGCTGA  
 2761 CCGCCCAACGACCCCGCCCATTTGACGTCAATAATGACGTATGTTCCCATAGTAACGCCA  
 2821 ATAGGGACTTTCCATTGACGTCAATGGGTGGAGTATTTACGGTAAACTGCCCACTTGGCA  
 2881 GTACATCAAGTGTATCATATGCCAAGTACGCCCCCTATTGACGTCAATGACGGTAAATGG  
 2941 CCCGCCGTCATTATGCCCAGTACATGACCTTATGGGACTTTTCCCTACTTGGCAGTACATC  
 3001 TACGTATTAGTCATCGCTATTACCATTGGTGTATGCGGTTTTTGGCAGTACATCAATGGGCGT  
 3061 GGATAGCGGTTTTGACTACCGGGATTTCCAAGTCTCCACCCATTGACGTCAATGGGAGT  
 3121 TTGTTTTGGCACCAAAATCAACGGGACTTTTCCAAAATGTCGTAACAACCTCCGCCCCATTG  
 3181 ACGCAAATGGGCGGTAGGCGTGTACGGTGGGAGGTCATATAAAGCAGAGCTCTCTGGCTA  
 3241 ACTAGAGAACCCACTGCTTACTGGCTTATCGAAATTAATACGACTCACTATAGGGAGACC  
 3301 CAAGCTGGCTAGCGAAGTTCCATTTCTCTAGAAAGTATAGGAACTTCATGAGGACCAGGC  
 3361 TGCCATCTCCCCCTGCCCTTCCCCCGCATTTAGCGCTGGGAGCTTTAGCGACCTGCTTA  
 3421 GGCAGTTCGACCCAGCTTGTTCACACCAGCCTGTTTTGACAGCCTGCCTCCCTTCGGAG

3481 CGCACCACACCGAAGCCGCCACCGGCGAGTGGGACGAGGTGCAAAGCGGCCTGAGGGCAG  
3541 CGGACGCTCCTCCGCCAACCATGAGGGTGGCAGTGACAGCAGCTAGGCCCCCTCGGGCAA  
3601 AACCTGCACCCAGGAGAAGGGCTGCCCAACCCAGCGACGCGAGTCCAGCCGCACAGGTGG  
3661 ACCTCAGGACGCTGGGCTACAGCCAGCAACAGCAAGAGAAGATCAAGCCCAAAGTAAGGA  
3721 GCACCGTGGCCAGCACCACGAGGCCCTGGTGGGTACCGCTTACCCACGCGCATATCG  
3781 TTGCTCTGAGCCAACATCCCGCAGCTCTGGGTACCCTTGCAGTGAAGTATCAGGACATGA  
3841 TCGCGGCACTGCCCTGAAGCTACACACGAAGCCATAGTGGGCGTTGGCAAGCAGTGGAGCG  
3901 GTGCCAGAGCGCTTGAGGCACGTGTGACGGTGGCTGGCGAGCTGAGGGGACCGCCACTGC  
3961 AACTGGACACCGGCCAACCTGCTGAAGATCGCCAAGAGGGGAGGCGTGACGGCGGTGGAGG  
4021 CCGTGCATGCCCTGGAGGAATGCCCTGACCGGCGCGCCCTGAACCTGACACCAGAGCAAG  
4081 TAGTGGCTATTGCAAGTAACATCGGTGGCAAACAAGCGCTGGAGACCGTGCAGAGGCTCC  
4141 TTCCGGTGCCTTGCCAAGCACACGGTTTGACCCCGAACAGGTTGTAGCCATAGCTTCTA  
4201 ACAACGGAGGTAAGCAGGCAC TGAAACCGTGCAGCGCTGCTCCCAGTACTGTGT CAGG  
4261 CTCATGGGCTCACTCCGGAACAGGTGGTGCGAATCGCGAGCAACGGCGGGCGCAAGCAAG  
4321 CCTTGAGACAGTCCAAAGACTTTTGCCTGTCTTTGT CAGGCGCATGGCCTTACGCCTG  
4381 AGCAAGTCGTTGCGATCGCCTCCCACGACGGCGAAAACAGGCTTTGGAAACCGTGCAGC  
4441 GGTGCTGCCGTTTTTGTGCCAAGCCCACGGATTGACCCCGAACAGGTTGTAGCCATAG  
4501 CTTCTAACATCGGAGGTAAGCAGGCAC TGAAACCGTGCAGCGCTGCTCCCAGTACTGT  
4561 GTCAGGCTCATGGGCTCACTCCGGAACAGGTGGTGC GAATCGCGAGCAACGGCGGGCGGA  
4621 AGCAAGCCCTTGAGACAGTCCAAAGACTTTTGCCTGTCTTTGT CAGGCGCATGGCCTTA  
4681 CGCTGAGCAAGTCGTTGCGATCGCCTCCCACGACGGCGGAAAACAGGCTTTGGAAACCG  
4741 TGCAGCGGTTGCTGCCGTTTTTGTGCCAAGCCCACGGATTGACCCCGAACAGGTTGTAG  
4801 CCATAGCTTCTAACAAACGGAGGTAAGCAGGCAC TGAAACCGTGCAGCGCTGCTCCCAG  
4861 TACTGTGTCAGGCTCATGGGCTTACGCCTGAGCAAGTCGTTGCGATCGCCTCCCACGACG  
4921 GCGGAAAACAGGCTTTGGAAACCGTGCAGCGGTTGCTGCCGTTTTTGTGCCAAGCCCACG  
4981 GACTCACTCCGGAACAGGTGGTGC GAATCGCGAGCAACGGCGGGCGCAAGCAAGCCCTTG  
5041 AGACAGTCCAAAGACTTTTGCCTGTCTTTGT CAGGCGCATGGCCTGACACCAGAGCAAG  
5101 TAGTGGCTATTGCAAGTAACATCGGTGGCAAACAAGCGCTGGAGACCGTGCAGAGGCTCC  
5161 TTCCGGTGCCTTGCCAAGCACACGGTTTTGACCCCGAACAGGTTGTAGCCATAGCTTCTA  
5221 ACGGCGGAGGTAAGCAGGCAC TGAAACCGTGCAGCGCTGCTCCCAGTACTGTGT CAGG  
5281 CTCATGGGCTCACTCCGGAACAGGTGGTGC GAATCGCGAGCAACGGCGGGCGGAAGCAAG  
5341 CCCTTGAGACAGTCCAAAGACTTTTGCCTGTCTTTGT CAGGCGCATGGCCTGACACCAG  
5401 AGCAAGTAGTGGCTATTGCAAGTAACATCGGTGGCAAACAAGCGCTGGAGACCGTGCAGCA  
5461 GGCTCCTTCCGGTGCCTTGCCAAGCACACGGTCTCACTCCGGAACAGGTGGTGC GAATCG  
5521 CGAGCCACGACGGCGGCAAGCAAGCCCTTGAGACAGTCCAAAGACTTTTGCCTGTCTTTT  
5581 GTCAGGCGCATGGCCTTACGCCTGAGCAAGTCGTTGCGATCGCCTCCCACGACGGCGGAA  
5641 AACAGGCTTTGGAAACCGTGCAGCGGTTGCTGCCGTTTTTGTGCCAAGCCCACGGACTGA  
5701 CACCAGAGCAAGTAGTGGCTATTGCAAGTAACATCGGTGGCAAACAAGCGCTGGAGAGCA  
5761 TCGTGGCCCAGCTGTCTCGGCCCGACCTGCCCTCGCCGCTCTGACCAACGACCACCTGG  
5821 TGGCCCTGGCTTGCCTCGGGGGACGGCCAGCTCTTGACGCCGTGAAGAAGGGCCTTCCCTC  
5881 ACGCCCCAGCCCTGATCAAGCGGACCAACAGAAGGATTCCCAGAGGACATCACATCGAG  
5941 TGGCAGATCACGCGCAAGTGGTCCGCGTGTCTCGGATTCCTCCAGTGTCACTCCCACCCCG  
6001 CACAAGCGTTCGATGACGCCATGACTCAATTTGGTATGTGAGACACGGACTGTG CAGC  
6061 TCTTTCGTAGAGTCGGTGTACAGAACTCGAGGCCCGCTCGGGCACACTGCCTCCCACCT  
6121 CCCAGCGTGGGACAGGATTC TCCAAGCGAGCGGTATGAAACGCGCGAAGCCTTCCACCTA  
6181 CGTCAACTCAGACACCTGACCAGGCGAGCCTTCATGCGTTTCGAGACTCGCTGGAGAGGG  
6241 ATTTGGACGCGCCCTCGCCCATGCATGAAGGGGACCAAAC TCGCGCGTCAGCTAGCCCCA  
6301 AGAAGAAGAGAAAGGTGGAGGCCAGCGGTTCCGGACGGGCTGACGCATTGGACGATTTTG  
6361 ATCTGGATATGCTGGGAAGTGACGCCCTCGATGATTTTGACCTTGACATGCTTGGTTCCG  
6421 ATGCCCTTGATGACTTTGACCTCGACATGCTCGGCAGTGACGCCCTTGATGATTTCCGACC  
6481 TGGACATGCTGATTAAC TCTAGAGGCAGTGGAGAGGGCAGAGGAAGTCTGCTAACATGCG  
6541 GTGACGTCGAGGAGAATCCTGGCCCAGTGAGCAAGGGCGAGGAGGATAACATGGCCATCA  
6601 TCAAGGAGTTCATGCGCTTCAAGGTGCACATGGAGGGCTCCGTGAACGGCCACGAGTTCC  
6661 AGATCGAGGGCGAGGGCGAGGGCCGCCCTACGAGGGCACCCAGACCAGCAAGCTGAAGG  
6721 TGACCAAGGGTGGCCCCCTGCCCTTCGCTGGGACATCCTGTCCCCTCAGTTCATGTACG  
6781 GCTCCAAGGCCTACGTGAAGCACCCCGCCGACATCCCCGACTACTTGAAGCTGTCTTCC  
6841 CCGAGGGCTTCAAGTGGGAGCGCTGATGAAC TTCGAGGACGGCGGCTGGTGACCCGTA  
6901 CCCAGACTCCCTCCCTGCAGGACGGCGAGTTCATCTACAAGGTGAAGCTGCGGACCACCA  
6961 ACTTCCCCTCCGACGGCCCCGTAATGCAGAAGAAGACCATGGGCTGGGAGGCCTCCTCCG  
7021 AGCGGATGTACCCCGAGGACGGCGCCCTGAAGGGCGAGATCAAGCAGAGGCTGAAGCTGA  
7081 AGGACGGCGGCCACTACGACGCTGAGGTCAAGACCACCTACAAGGCCAAGAAGCCCGTGC  
7141 AGCTGCCCGGCGCTACAACGTCAACATCAAGTTGGACATCACCTCCCACAACGAGGACT  
7201 ACACCATCGTGGAAACAGTACGAACGCGCCGAGGGCCGCCACTCCACCGGCGGCATGGACG

7261 AGCTGTACAAGTAACATGTTTAAAGGGTCCGGTCCACTAGGTACAATTCGATATCAAGC  
 7321 TTATCGATAATCAACCTCTGGATTACAAAATTTGTGAAAGATTGACTGGTATTCTTAACT  
 7381 ATGTTGCTCCTTTTACGCTATGTGGATACGCTGCTTTAATGCCTTTGTATCATGCTATTG  
 7441 CTCCCCGTATGGCTTTCATTTTCTCCTCCTTGTATAAATCCTGGTTGCTGTCTCTTTATG  
 7501 AGGAGTTGTGGCCCGTTGTCCAGGCAACGTGGCGTGGTGTGCACTGTGTTTGCTGACGCAA  
 7561 CCCCCACTGGTTGGGGCATTGCCACCACCTGTCAGCTCCTTTCCGGGACTTTCCGCTTTCC  
 7621 CCTCCCTATTTGCCACGGCGGAACCTATCGCCGCCTGCCTTGCCCGCTGCTGGACAGGGG  
 7681 CTCGGCTGTGGGCACGACAATCCCGTGGTGTGTGCGGGGAAATCATCGTCTCTTTCCCTT  
 7741 GGCTGCTCGCCTGTGTTGCCACCTGGATTCTGCGCGGGACGTCCTTCTGCTACGTCCCTT  
 7801 CGGCCCTCAATCCAGCGGACCTTCCCTTCCCGCGCCTGCTGCCGGCTCTGCGGCCTCTTC  
 7861 CGCGTCTTCGCCTTCGCCCTCAGACGAGTCGGATCTCCCTTTGGGCCGCCTCCCCGCATC  
 7921 GATACCGTCGACCTCGATCGAGACCTAGAAAAACATGGAGCAATCACAAGTAGCAATACA  
 7981 GCAGCTACCAATGCTGATTGTGCCCTGGCTAGAAGCACAAGAGGAGGAGGAGGTGGGTTTT  
 8041 CCAGTCACACCTCAGGTACCTTTAAGACCAATGACTTACAAGGCAGCTGTAGATCTTAGC  
 8101 CACTTTTTTAAAAGAAAAGGGGGGACTGGAAGGGCTAATTCCTCCCAACGAAGACAAGAT  
 8161 ATCCTTGATCTGTGGATCTACCACACACAAGGCTACTTCCCTGATTGGCAGAACTACACA  
 8221 CCAGGGCCAGGGATCAGATATCCACTGACCTTTGGATGGTGTCTACAAGCTAGTACCAGTT  
 8281 GAGCAAGAGAAGGTAGAAGAAGCCAATGAAGGAGAGAACACCCCGCTTGTACACCCTGTG  
 8341 AGCCTGCATGGGATGGATGACCCGGAGAGAGAAGTATTAGAGTGGAGGTTTGACAGCCGC  
 8401 CTAGCATTTTCATGACATGGCCCGAGACTGCATCCGGACTGTACTGGGTCTCTCTGGTTA  
 8461 GACCAGATCTGAGCCTGGGAGCTCTCTGGCTAACCTAGGGAAACCCACTGCTTAAGCTCAA  
 8521 TAAAGCTTGCCCTTGAGTGCCTCAAGTAGTGTGTGCCCGTCTGTTGTGTGACTCTGGTAA  
 8581 TAGAGATCCCTCAGACCCTTTTAGTCAGTGTGGAATACTCTAGCAGCATGTGAGCAAAA  
 8641 GGCCAGCAAAAGGCCAGGAACCGTAAAAAGGCCGCGTTGCTGGCGTTTTTCCATAGGCTC  
 8701 CGCCCCCTGACGAGCATCACAAAATCGACGCTCAAGTCAGAGGTGGCGAAACCCGACA  
 8761 GGACTATAAAGATAACCAGGCGTTTCCCCCTGGAAGCTCCCTCGTGCCTCTCCTGTTCCG  
 8821 ACCCTGCCGCTTACCGGATACCTGTCCGCCTTCTCCCTTCGGGAAGCGTGGCGCTTTCT  
 8881 CATAGCTCACGCTGTAGGTATCTCAGTTCGGTGTAGGTGCTTCGCTCCAAGCTGGGCTGT  
 8941 GTGCACGAACCCCCGTTTCCAGCCGACCGCTGCGCCTTATCCGGTAACTATCGTCTTGAG  
 9001 TCCAACCCGGTAAGACACGACTTATCGCCACTGGCAGCAGCCACTGGTAACAGGATTAGC  
 9061 AGAGCGAGGTATGTAGGCGGTGCTACAGAGTCTTGAAGTGGTGGCCTAACTACGGCTAC  
 9121 ACTAGAAGAACAGTATTTGGTATCTGCGCTCTGCTGAAGCCAGTTACCTTCGGAAAAGA  
 9181 GTTGGTAGCTCTTGTCCGGCAAACAACCACCGCTGAGGTAGCGGTGGTTTTTTTTTTTGC  
 9241 AAGCAGCAGATTACGCGCAGAAAAAAGGATCTCAAGAAGATCCTTTGATCTTTTCTACG  
 9301 GGGTCTGACGCTCAGTGGAAACGAAAACCTACGTTAAGGGATTTTGGTCATGAGATTATCA  
 9361 AAAAGGATCTTCACCTAGATCCTTTTAAATTAATAATGAAGTTTTAAATCAATCTAAAGT  
 9421 ATATATGAGTAAACTTGGTCTGACAGTTACCAATGCTTAATCAGTGAGGCACCTATCTCA  
 9481 GCGATCTGTCTATTTTCGTTTCATCCATAGTTGCCCTGACTCCCCGTCGTGTAGATAACTACG  
 9541 ATACGGGAGGGCTTACCATCTGGCCCCAGTGCATGATAACCGCGAGACCCACGCTCA  
 9601 CCGGCTCCAGATTTATCAGCAATAAACCAGCCAGCCGGAAGGGCCGAGCGCAGAAGTGGT  
 9661 CCTGCAACTTTTATCCGCCTCCATCCAGTCTATTAATTGTTGCCGGGAAGCTAGAGTAAGT  
 9721 AGTTCGCCAGTTAATAGTTTGGCGAACGTTGTGTCATTGCTACAGGCATCGTGGTGTCA  
 9781 CGCTCGTCTGTTGGTATGGCTTTCATTCAGCTCCGGTTCCTCAACGATCAAGGCGAGTTACA  
 9841 TGATCCCCATGTTGTGCAAAAAGCGGTTAGCTCCTTCGGTCTCCGATCGTTGTGTCAGA  
 9901 AGTAAGTTGGCCGAGTGTATCACTCATGGTTATGGCAGCACTGCATAATTCTCTTACT  
 9961 GTCATGCCATCCGTAAGATGCTTTTTCTGTGACTGGTGAGTACTCAACCAAGTCATTCTGA  
 10021 GAATAGTGTATGCGGCGACCGAGTTGCTCTTGGCCGGCGTCAATACGGGATAATACCGCG  
 10081 CCACATAGCAGAACTTTAAAAGTGCTCATCATTTGAAAACGTTCTTCGGGGCGAAAACCTC  
 10141 TCAAGGATCTTACCGCTGTTGAGATCCAGTTCGATGTAACCCACTCGTGCACCCAACTGA  
 10201 TCTTCAGCATCTTTTACTTTTACCAGCGTTTCTGGGTGAGCAAAAACAGGAAGGCAAAAT  
 10261 GCCGCAAAAAGGGAATAAGGGCGACACGGAAATGTTGAATACTCATACTCTTCTTTTTT  
 10321 CAATATTAATGAAGCATTTTATCAGGGTTATTGTCTCATGAGCGGATACATATTTGAATGT  
 10381 ATTTAGAAAAATAAACAAATAGGGGTTCCGCGCACATTTCCCCGAAAAGTGCCACCTGAC

2622-3276 bp: CMV promoter

3348-4064 bp: TALE N-terminus

4065-5756 bp: TALE repeat array (NI NN NG HD NI NG HD NN HD NG NI NG NG NI HD HD NI)

5757-6290 bp: TALE C-terminus

6291-6332 bp: NLS

6333-6497 bp: VP64

6504-6566 bp: 2A peptide

6567-7274 bp: mCherry

**RVD Library Entry Vector**

The following sequence was inserted into the TA-cloning site of pMD19-T vector (Takara, Inc.).

```

1   TAGCTATACGTCTCATTGACCCCCGAACAGGTTGTAGCCATAGCTTCTAAGTCTTCAGAG
61  ACGCTGGCTTATCGAAATTAATACGACTCACTATAGGGAGACCCAAGCTGGCTAGTTAAG
121 CTATCAACAAGTTTGTACAAAAAAGCTGAACGAGAAACGTAAAATGATATAAATATCAAT
181 ATATTTAAATTAGATTTTGCATAAAAAACAGACTACATAATACTGTAAAACACAACATATC
241 CAGTCACTATGAATCAACTACTTAGATGGTATTAGTGACCTGTAGTCGACCGACAGCCTT
301 CCAAATGTTCTTTCGGGTGATGCTGCCAACTTAGTCGACCGACAGCCTTCCAAATGTTCTT
361 CTCAAAACGGAATCGTCGTATCCAGCCTACTCGCTATTGTCTCAATGCCGTATTAAATCA
421 TAAAAAGAAAATAAGAAAAAGAGGTGCGAGCCTCTTTTTTGTGTGACAAAATAAAAAACATC
481 TACCTATTTCATATACGCTAGTGTATAGTCTGAAAATCATCTGCATCAAGAACAATTTTC
541 ACAACTCTTATACTTTTCTCTTACAAGTCGTTTCGGCTTCATCTGGATTTTTCAGCCTCTAT
601 ACTTACTAAACGTGATAAAGTTTCTGTAATTTCTACTGTATCGACCTGCAGACTGGCTGT
661 GTATAAGGGAGCCTGACATTTATATTTCCCGAGAATCAGGTTAATGGCGTTTTTGTATGT
721 CATTTTTCGCGGTGGCTGAGATCAGCCACTTCTTCCCGATAACGGAGACCGGCACACTGG
781 CCATATCGGTGGTCATCATGCGCCAGCTTTCATCCCCGATATGCACCACCGGGTAAAGTT
841 CACGGGAGACTTTTATCTGACAGCAGACGTGCACTGGCCAGGGGGATCACCATCCGTCGCC
901 CGGGCGTGTCAATAATATCACTCTGTACATCCACAAACAGACGATAACGGCTCTCTCTTT
961 TATAGGTGTA AACCTTAAACTGCATTTTACCAGCCCCGTTCCTCGTCAGCAAAAAGAGCCG
1021 TTCATTTCAATAAACCGGGGACCTCAGCCATCCCTTCCCTGATTTTCCGCTTTCCAGCGT
1081 TCGGCACGCAGACGACGGGCTTTCATTTCTGCATGGTTGTGCTTACCAGACCGGAGATATTG
1141 ACATCATATATGCCTTGAGCAACTGATAGCTGTGCTGTCAACTGTCACTGTAATACGCT
1201 GCTTCATAGCATACTCTTTTTGACATACTTCGGGTATACATATCAGTATATATTCTTAT
1261 ACCGCAAAAATCAGCGCGCAAATACGCATACTGTTATCTGGCTTTTAGTAAGCCGGATCC
1321 ACGCGGCGTTTACGCCCCCTGCCACTCATCGCAGTACTGTTGTAATTCATTAAGCATT
1381 CTGCCGACATGGAAGCCATCACAACGGCATGATGAACCTGAATCGCCAGCGGCATCAGC
1441 ACCTTGTCGCCTTGCGTATAATATTTGCCCATGGTGAAAACGGGGGCGAAGAAGTTGTCC
1501 ATATTGGCCACGTTTAAATCAAACCTGGTGAAACTCACCCAGGGATTGGCTGAGACGAAA
1561 AACATATTCTCAATAAACCCCTTAGGGAAATAGGCCAGGTTTTTACCAGTAACACGCCACA
1621 TCTTGCGAATATATGTGTAGAAACTGCCGAAATCGTCGTGGTATTCACTCCAGAGCGAT
1681 GAAAACGTTTCAGTTTGCATGGAACGGTGTAAACAAGGGTGAACACTATCCCATATC
1741 ACCAGCTCACCGTCTTTTCAATGCCATACGGAATTCGGGATGAGCATTTCATCAGGCGGCA
1801 AGAATGTGAATAAAGCCGGATAAAAACCTTGTGCTTATTTTTCTTTACGGTCTTTAAAAAG
1861 GCCGTAATATCCAGCTGAACGGTCTGGTTATAGGTACATTGAGCAACTGACTGAAATGCC
1921 TCAAAAATGTTCTTTACGATGCCATTTGGGATATATCAACGGTGGTATATCCAGTGATTTTT
1981 TTCTCCATTTTAGCTTCCCTTAGCTCCTGAAAATCTCGATAACTCAAAAAATACGCCCGGT
2041 AGTGATCTTATTTTCAATATGGTGAAAGTTGGAACCTCTTACGTGCCGATCAACGTCTCAT
2101 TTTCGCCAAAAGTTGGCCCAGGGCTTCCCGGTATCAACAGGGACACCAGGATTTATTTAT
2161 TCTGCGAAGTGATCTTCCGTACAGGTATTTATTCGGCGCAAAGTGCGTCGGGTGATGCT
2221 GCCAACTTAGTCGACTACAGGTCACTAATACCATCTAAGTAGTTGATTCATAGTGACTGG
2281 ATATGTTGTGTTTTACAGTATTATGTAGTCTGTTTTTTATGCAAAATCTAATTTAATATA
2341 TTGATATTTATATCATTTTACGTTTCTCGTTCAGCTTCTTGTACAAAGTGTTGATCTA
2401 GAGGGCCCCGGTTCCGACGTCCTGAAGACAAGGAGGTAAGCAGGCACTGGAACCGTG
2461 CAGCGCCTGCTCCAGTACTGTGTGTCAGGCTCATGGGTGAGACGTATAGCTA

```

16-48 bp: N-terminus of the TALE repeats

57-2425 bp: ccdB cassette

2434-2496 bp: C-terminus of the TALE repeats

**RVD Library Vector**

1 GTCGACGGATCGGGAGATCTCCCGATCCCCATGGTGCACCTCTCAGTACAATCTGCTCTG  
61 ATGCCGCATAGTTAAGCCAGTATCTGCTCCCTGCTTGTGTGTTGGAGGTCGCTGAGTAGT  
121 GCGCGAGCAAAATTTAAGCTACAACAAGGCAAGGCTTGACCCGACAATTGCATGAAGAATC  
181 TGCTTAGGGTTAGGCGTTTTGCGCTGCTTCGCGATGTACGGGCCAGATATACGCGTTGAC  
241 ATTGATTATTGACTAGTTATTAATAGTAATCAATTACGGGGTCATTAGTTCATAGCCCAT  
301 ATATGGAGTTCGCGTTACATAACTTACGGTAAATGGCCCGCTGGCTGACCGCCCAACG  
361 ACCCCCGCCATTGACGTCAATAATGACGTATGTTCCCATAGTAACGCCAATAGGGGACTT  
421 TCCATTGACGTCAATGGGTGGAGTATTTACGGTAAACTGCCCACTTGGCAGTACATCAAG  
481 TGTATCATATGCCAAGTACGCCCCCTATTGACGTCAATGACGGTAAATGGCCCGCCTGGC  
541 ATTATGCCCAGTACATGACCTTATGGGACTTTCCCTACTTGGCAGTACATCTACGTATTAG  
601 TCATCGCTATTACCATGGTGTATGCGGTTTTGGCAGTACATCAATGGGCGTGGATAGCGGT  
661 TTGACTCACGGGGATTTCCAAGTCTCCACCCCATTTGACGTCAATGGGAGTTTTGTTTTGGC  
721 ACCAAAATCAACGGGACTTTTCCAAAATGTCGTAACAACCTCCGCCCATTTGACGCAAAATGG  
781 GCGGTAGGCGTGTACGGTGGGAGGTCATATAAGCAGCGCGTTTTGCTGTACTGGGTCT  
841 CTCTGGTTAGACCAGATCTGAGCCTGGGAGCTCTCTGGCTAACTAGGGAACCCACTGCTT  
901 AAGCCTCAATAAAGCTTGCCTTGAGTGTCTCAAGTAGTGTGTGCCCGTCTGTTGTGTGAC  
961 TCTGGTAACTAGAGATCCCTCAGACCCTTTTAGTCAGTGTGGAAAATCTCTAGCAGTGGC  
1021 GCCCGAACAGGGACTTGAAAGCGAAAGGGAAACCAGAGGAGCTCTCTCGACGCAGGACTC  
1081 GGCTTGTGTAAGCGCGCACGGCAAGAGGCGAGGGGCGGCGACTGGTGAGTACGCCAAAAA  
1141 TTTTGACTAGCGGAGGCTAGAAGGAGAGAGATGGGTGCGAGAGCGTCAGTATTAAGCGGG  
1201 GGAGAAATTAGATCGCGATGGGAAAAAATTCGGTTAAGGCCAGGGGGAAAGAAAAAATATA  
1261 AATTAAAACATATAGTATGGGCAAGCAGGGAGCTAGAACGATTCGCAGTTAATCCTGGCC  
1321 TGTTAGAAACATCAGAAGGCTGTAGACAATACTGGGACAGCTACAACCATCCCTTCAGA  
1381 CAGGATCAGAAGAACTTAGATCATTATATAATACAGTAGCAACCCCTCTATTGTGTGCATC  
1441 AAAGGATAGAGATAAAAGACACCAAGGAAGCTTTAGACAAGATAGAGGAAGAGCAAAACA  
1501 AAAGTAAGACCACCGCACAGCAAGCGGCCGCGCGCTGATCTTCAGACCTGGAGGAGGA  
1561 GATATGAGGGACAATTGGAGAAGTGAATTATATAAAATATAAAGTAGTAAAAATTGAACCA  
1621 TTAGGAGTAGCACCCACCAAGGCAAAGAGAAGAGTGGTGCAGAGAGAAAAAGAGCAGTG  
1681 GGAATAGGAGCTTTGTTCCTTGGGTTCTTGGGAGCAGCAGGAAGCACTATGGGCGCAGCG  
1741 TCAATGACGCTGACGGTACAGGCCAGACAATTATTGTCTGGTATAGTGCAGCAGCAGAAC  
1801 AATTTGCTGAGGGCTATTGAGGCGCAACAGCATCTGTTGCAACTCACAGTCTGGGGCATC  
1861 AAGCAGCTCCAGGCAAGAATCCTGGCTGTGGAAGATACCTAAAGGATCAACAGCTCCTG  
1921 GGGATTTGGGGTTGCTCTGGAAAACCTCATTTGCACCCTGCTGTGCCTTGGAAATGCTAGT  
1981 TGGAGTAATAAATCTCTGGAACAGATTTGGAATCACACGACCTGGATGGAGTGGGACAGA  
2041 GAAATTAACAATTACACAAGCTTAATACACTCCTTAATTGAAGAATCGCAAAACCAGCAA  
2101 GAAAAGAATGAACAAGAATTATTGGAATTAGATAAATGGGCAAGTTTGTGGAATTTGGTTT  
2161 AACATAACAAAATTTGGCTGTGGTATATAAAAATTAATCATAATGATAGTAGGAGGTTGGTA  
2221 GGTTTAAGAATAGTTTTTGTGCTGACTTTCTATAGTGAATAGAGTTAGGCAGGGATATTCA  
2281 CCATTATCGTTTTAGACCCACCTCCCAACCCGAGGGGACCCGACAGGCCCGAAGGAATA  
2341 GAAGAAGAAGGTGGAGAGAGAGACAGAGACAGATCCATTCGATTAGTGAACGGATCGGCA  
2401 CTGCGTGCGCCAATTCCTGCAGACAAATGGCAGTATTCATCCACAATTTTAAAAGAAAAGG  
2461 GGGGATTTGGGGGTACAGTGCAGGGGAAAGAATAGTAGACATAATAGCAACAGACATACA  
2521 AACTAAAGAATTACAAAAACAAATTACAAAAATTCAAAATTTTCGGGTTTTATTACAGGGA  
2581 CAGCAGAGATCCAGTTTGGTTAGTACCGGGCCCGCTCTAGACGATGTACGGGCCAGATAT  
2641 ACGCGTTGACATTGATTATTGACTAGTTATTAATAGTAATCAATTACGGGGTCATTAGTT  
2701 CATAGCCCATATATGGAGTTCCGCGTTACATAACTTACGGTAAATGGCCCGCTGGCTGA  
2761 CCGCCCAACGACCCCGCCCATTTGACGTCAATAATGACGTATGTTCCCATAGTAACGCCA  
2821 ATAGGGACTTTCCATTGACGTCAATGGGTGGAGTATTTACGGTAAACTGCCCACTTGGCA  
2881 GTACATCAAGTGTATCATATGCCAAGTACGCCCCCTATTGACGTCAATGACGGTAAATGG  
2941 CCGCCTGGCATTATGCCAGTACATGACCTTATGGGACTTTCCCTACTTGGCAGTACATC  
3001 TACGTATTAGTCATCGCTATTACCATGGTGTATGCGGTTTTGGCAGTACATCAATGGGCGT  
3061 GGATAGCGGTTTACTCACGGGGATTTCCAAGTCTCCACCCCATTTGACGTCAATGGGAGT  
3121 TTGTTTTTGGCACCAAAATCAACGGGACTTTCCAAAATGTCGTAACAACCTCCGCCCATTTG  
3181 ACGCAAAATGGGCGGTAGGCGTGTACGGTGGGAGGTCATATAAGCAGAGCTCTCTGGCTA  
3241 ACTAGAGAACCCTGCTTACTGGCTTATCGAAATTAATACGACTCACTATAGGGAGACC  
3301 CAAGCTGGCTAGCGAAGTTCCATTCTCTAGAAAAGTATAGGAACTTCATGAGGACCAGGC  
3361 TGCCATCTCCCCCTGCCCTTCCCCCGCATTTAGCGCTGGGAGCTTTAGCGACCTGCTTA  
3421 GGCAGTTTCGACCCAGCTTGTTCACACCAGCCTGTTTACAGCCTGCCTCCCTTCGGAG  
3481 CGCACCACACCGAAGCCGCCACCGGCGAGTGGGACGAGGTGCAAAGCGGCCCTGAGGGCAG  
3541 CGGACGCTCCTCCGCCAACCATGAGGGTGGCAGTGACAGCAGCTAGGCCCCCTCGGGCAA

3601 AACCTGCACCCAGGAGAAGGGCTGCCAACCCAGCGACGCGAGTCCAGCCGCACAGGTGG  
3661 ACCTCAGGACGCTGGGCTACAGCCAGCAACAGCAAGAGAAGATCAAGCCCAAAGTAAGGA  
3721 GCACCGTGGCCAGCACCACGAGGCCCTGGTGGGTACGGCTTACCCACGCGCATATCG  
3781 TTGCTCTGAGCCAACATCCCGCAGCTCTGGGTACCCTTGGCGTGAAGTATCAGGACATGA  
3841 TCGCGGCACTGCCTGAAGCTACACACGAAGCCATAGTGGGCGTGGCAAGCAGTGGAGCG  
3901 GTGCCAGAGCGCTTGAGGCACTGTGACGGTGGCTGGCGAGCTGAGGGGACCGCCACTGC  
3961 AACTGGACACCGCCAACCTGCTGAAGATCGCCAAGAGGGGAGGCGTGACGGCGGTGGAGG  
4021 CCGTGCATGCCCTGGAGGAATGCCCTGACCGGCGGCCCTGAACAGAGACGCTGGCTTAT  
4081 CGAAATTAATACGACTCACATATAGGGAGACCCAAGCTGGCTAGTTAAGCTATCAACAAGT  
4141 TTGTACAAAAAGCTGAACGAGAAACGTAAAATGATATAAATATCAATATATTAAATTAG  
4201 ATTTTGCATAAAAAACAGACTACATAATACTGTA AAAACACAACATATCCAGTCACTATGA  
4261 ATCAACTACTTAGATGGTATTAGTGACCTGTAGTTCGACCGACAGCCTTCCAAATGTTCTT  
4321 CGGGTGATGCTGCCAACTTAGTTCGACCGACAGCCTTCCAAATGTTCTTCTCAAACGGAAT  
4381 CGTCGTATCCAGCCTACTCGCTATTGTCTCAATGCCGTATTAATCATAAAAAAGAAATA  
4441 AGAAAAAGAGGTGCGAGCCTCTTTTTTGTGTGACAAAATAAAAAACATCTACCTATTCTATA  
4501 TACGCTAGTGTCTATAGTCCTGAAAATCATCTGCATCAAGAACAATTTCACTACTTTATA  
4561 CTTTTCTCTTACAAGTCTTCCGGCTTCATCTGGATTTTTCAGCCTCTATACTTACTAAACG  
4621 TGATAAAGTTTCTGTAATTTCTACTGTATCGACCTGCAGACTGGCTGTGTATAAGGGAGC  
4681 CTGACATTTATATTTCCCCAGAACATCAGGTTAATGGCGTTTTTGATGTCATTTTCGCGGT  
4741 GGCTGAGATCAGCCACTTCTTCCCGGATAACGGGAGACCGGCACACTGGCCATATCGGTGG  
4801 TCATCATGCGCCAGCTTTCATCCCGATATGCACCACCGGGTAAAGTTCACGGGAGACTT  
4861 TATCTGACAGCAGACGTGCACTGGCCAGGGGGATCACCATCCGTCGCCCGGGCGTGTCAA  
4921 TAATATCACTCTGTACATCCACAAACAGACGATAACGGCTCTCTCTTTTTATAGGTGTAAA  
4981 CCTTAAACTGCATTTACCAGCCCTGTTCTCGTCAGCAAAAGAGCCGTTTCAATTTCAATA  
5041 AACCGGGCGACCTCAGCCATCCCTTCCGTATTTCCGCTTTCCAGCGTTCGGCACGCAGA  
5101 CGACGGGCTTCACTTGCATGGTGTGCTTACCAGACCGGAGATATTGACATCATATATG  
5161 CCTTGAGCAACTGATAGCTGTGCTGTCAACTGTCACTGTAATACGCTGCTTCATAGCAT  
5221 ACCTCTTTTTGACATACTTCGGGTATACATATCAGTATATATTCTTATACCGCAAAAATC  
5281 AGCGCGCAAATACGCATACTGTTATCTGGCTTTTAGTAAGCCGGATCCACGCGGGCTTTA  
5341 CGCCCCCTGCCACTCATCGCAGTACTGTTGTAATTCATTAAGCATTCTGCCGACATGG  
5401 AAGCCATCACAAACGGCATGATGAACCTGAATCGCCAGCGGCATCAGCACCTTGTGCGCT  
5461 TGCGTATAAATTTGCCCATGGTGA AAACGGGGGCGAAGAAGTTGTCCATATTGGCCACG  
5521 TTTAAATCAAACCTGGTGA AACCTCACCAGGGATTGGCTGAGACGAAAAACATTTCTCA  
5581 AATAACCTTTTAGGAAATAGGCCAGGTTTTTACCCTAACACGCCACATCTTGCAATAT  
5641 ATGTGTAGAACTGCCGAAATCGTCTGGTATTCACTCCAGAGCGATGAAAACGTTTCA  
5701 GTTTGCTCATGGAAAACGGTGTAAACAAGGGTGAACACTATCCCATATCACCAGCTCACC  
5761 TCTTTCATTGCCATACGGAATTCGGGATGAGCATTCATCAGGCGGCAAGAATGTGAATA  
5821 AAGCCGGATAAAACTTGTGCTTATTTTTCTTTACGGTCTTTAAAAAGGCCGTAATATCC  
5881 AGCTGAACGGTCTGGTTATAGGTACATTGAGCAACTGACTGAAATGCCTCAAATGTTCT  
5941 TTACGATGCCATTGGGATATATCAACGGTGGTATATCCAGTGATTTTTTTCTCCATTTTA  
6001 GCTTCCCTAGCTCCTGAAAATCTCGATAACTCAAAAATACGCCCGGTAGTGATCTTATT  
6061 TCATTTATGGTGAAGTTGGAACCTCTTACGTGCCGATCAACGTCTCATTTTCGCCAAAAG  
6121 TTGGCCAGGGCTTCCCGGTATCAACAGGGACACCAGGATTTATTTATTCTGCGAAGTGA  
6181 TCTTCCGTACAGGTATTTATTCGGCGCAAAGTGCCTCGGGTGTGCTGCCAAGTTGATG  
6241 GACTACAGTCACTAATACCATCTAAGTAGTTGATTCATAGTGACTGGATATGTTGTGTT  
6301 TTACAGTATTATGTAGTCTGTTTTTTTATGCAAAAATCTAATTTAATATATTGATATTTATA  
6361 TCATTTTACGTTTCTCGTTCAGCTTTCTTGTACAAAGTGGTTGATCTAGAGGGCCCGCG  
6421 TTCGAACGCTCTTAGCATCGTGGCCAGCTGTCTCGGCCCGACCCTGCCCTCGCCGCTCT  
6481 GACCAACGACCACCTGGTGGCCCTGGCTTGCCCTCGGGGCGAGCCAGCTCTTGACGCCGT  
6541 GAAGAAGGGCTTCCCTACGCCCCAGCCCTGATCAAGCGGACCAACAGAAGGATTTCCCGA  
6601 GAGGACATCACATCGAGTGGCAGATCACGCGCAAGTGGTCCGCGTGCTCGGATTTCCA  
6661 GTGTCATCCCACCCCGCACAAAGCTTCGATGACGCCATGACTCAATTTGGTATGTGCGAG  
6721 ACACGGACTGCTGCAGCTCTTTTCGTAGAGTCCGGTGTACAGAACTCGAGGCCCGCTCGGG  
6781 CACACTGCCCTCCCGCTCCAGCGGTGGGACAGGATTTCTCCAAGCGAGCGGTATGAAACG  
6841 CGCGAAGCCTTACCCTACGTCAACTCAGACACCTGACCAGGCGAGCCTTCATGCGTTCCG  
6901 AGACTCGCTGGAGAGGGATTTGGACGCGCCCTCGCCCATGCATGAAGGGGACCAAACTCG  
6961 CGCGTACGATGCCCAAAGAAGAAGGAGGAGGAGGCGGTTCCGGACGGGCTGAC  
7021 CGCATTTGACGATTTTGTATCTGGATATGCTGGGAAGTGCAGCCCTCGATGATTTTGACCT  
7081 TGACATGCTTGGTTCCGATGCCCTTGATGACTTTGACCTCGACATGCTCGGCAGTGACGC  
7141 CCTTGATGATTTTCGACCTGGACATGCTGATTAACCTTAGAGGCAGTGGAGAGGGCAGAGG  
7201 AAGTCTGCTAACATGCGGTGACGTCGAGGAGAATCCTGGCCAGTGAGCAAGGGCGAGGA  
7261 GGATAACATGGCCATCATCAAGGAGTTCATGCGCTTCAAGGTGCACATGGAGGGCTCCGT  
7321 GAACGGCCACGAGTTCGAGATCGAGGGCGAGGGCGAGGGCCGCCCTACGAGGGCACCCA

7381 GACCGCCAAGCTGAAGGTGACCAAGGGTGGCCCCCTGCCCTTCGCCTGGGACATCCTGTG  
7441 CCCTCAGTTCATGTACGGCTCCAAGGCCTACGTGAAGCACCCCGCCGACATCCCCGACTA  
7501 CTTGAAGCTGTCCCTCCCGAGGGCTTCAAGTGGGAGCGCGTGATGAACTTCGAGGACGG  
7561 CGGCGTGGTGACCGTGACCCAGGACTCCTCCCTGCAGGACGGCGAGTTCATCTACAAGGT  
7621 GAAGCTGCGCGGCACCAACTTCCCTCCGACGGCCCCGTAATGCAGAAGAAGACCATGGG  
7681 CTGGGAGGCCCTCCTCCGAGCGGATGTACCCCGAGGACGGCGCCCTGAAGGGCGAGATCAA  
7741 GCAGAGGCTGAAGCTGAAGGACGGCGGCCACTACGACGCTGAGGTCAAGACCACCTACAA  
7801 GGCCAAGAAGCCCGTGCAGCTGCCCGCGCCCTACAACGTCAACATCAAGTTGGACATCAC  
7861 CCCCCACAACGAGGACTACACCATCGTGGAACAGTACGAACGCGCCGAGGGCCGCCACTC  
7921 CACCGGCGGCATGGACGAGCTGTACAAGTAACATGTTTAAGGGTTCGGTTCCTACTAGGT  
7981 ACAATTTCGATATCAAGCTTATCGATAATCAACCTCTGGATTACAAAATTTGTGAAAGATT  
8041 GACTGGTATCTTAACTATGTTGCTCCTTTTACGCTATGTGGATACGCTGCTTTAATGCC  
8101 TTTGTATCATGCTATTTGCTTCCCGTATGGCTTTCATTTTCTCCTTGTATAAATCCTG  
8161 GTTGTGTCTCTTTATGAGGAGTTGTGGCCCGTTGTCAGGCAACGTGGCGTGGTGTGCAC  
8221 TGTGTTTGTCTGACGCAACCCCACTGGTGGGGCATTGCCACCACCTGTGAGCTCCTTTC  
8281 CGGGACTTTCGCTTTCCCCCCTCCCTATTGCCACGGCGGAACCTATCGCCGCCTGCCTTG  
8341 CCGCTGCTGGACAGGGGCTCGGCTGTTGGGCACTGACAATTCGGTGGTGTGTCGGGGAA  
8401 ATCATCGTCCCTTCCCTGGCTGCTCGCCTGTGTTGCCACCTGGATTCTGCGCGGGACGTC  
8461 CTTCGTCTACGTCCCTTCGGCCCTCAATCCAGCGGACCTTCCCTCCCGCGGCCTGCTGCC  
8521 GGCTCTGCGCCCTTCCGCGTCTTCGCTTCGCTTCGCTCAGACGAGTCCGATCTCCCTTG  
8581 GGCCGCTCCCGCTCATGATACCGTCCGACCTCGATCGAGACCTAGAAAAACATGGAGCAA  
8641 TCACAAGTAGCAATACAGCAGCTACCAATGCTGATTGTGCCTGGCTAGAAGCACAAGAGG  
8701 AGGAGGAGGTGGGTTTTCCAGTACACCTCAGGTACCTTTAAGACCAATGACTTACAAGG  
8761 CAGCTGTAGATCTTAGCCACTTTTTAAAAGAAAAGGGGGACTGGAAGGGCTAATTCCT  
8821 CCCAACGAAGACAAGATATCCTTGATCTGTGGATCTACCACACACAAGGCTACTTCCCTG  
8881 ATTTGGCAGAACTACACACCAGGGCCAGGGATCAGATATCCACTGACCTTTGGATGGTGT  
8941 ACAAGCTAGTACCAGTTGAGCAAGAGAAGGTAGAAGAAGCCAATGAAGGAGAGAACACCC  
9001 GCTTGTACACCTGTGAGCCTGCATGGGATGGATGACCCGGAGAGAGAAGTATTAGAGT  
9061 GGAGGTTTGACAGCCGCCTAGCATTTTCATCACATGGCCCCGAGAGCTGCATCCGGACTGTA  
9121 CTGGGTCTCTCTGGTTAGACCAGATCTGAGCCTGGGAGCTCTCTGGCTAACTAGGGAACC  
9181 CACTGCTTAAGCCTCAATAAAGCTTGCCCTGAGTGTCTCAAGTAGTGTGTGCCCGTCTGT  
9241 TGTGTGACTCTGGTAACTAGAGATCCCTCAGACCTTTTAGTCAGTGTGGAAAATCTCTA  
9301 GCAGCATCTGAGCAAAAAGGCCAGCAAAAAGGCCAGGAACCGTAAAAAGGCCCGCTGTG  
9361 CGTTTTTCCATAGGCTCCGCCCCCTGACGAGCATCACAAAAATCGACGCTCAAGTCAGA  
9421 GGTGGCGAAAACCCGACAGGACTATAAAGATACCAGGCGTTTTCCCCCTGGAAGCTCCCTCG  
9481 TGCGCTCTCCTGTTCCGACCCCTGCCGCTTACCAGGATACCTGTCCGCTTTTCTCCCTTCGG  
9541 GAAGCGTGGCGCTTCTCATAGCTCACGCTGTAGGTATCTCAGTTCGGTGTAGGTCGTTT  
9601 GCTCCAAGCTGGGCTGTGTGCACGAACCCCGTTCAGCCCGACCGCTGCGCCTTATCCG  
9661 GTAACATATCGTCTTGAGTCCAACCCGGTAAGACACGACTTATCGCCACTGGCAGCAGCCA  
9721 CTGGTAACAGGATTAGCAGAGCGAGGTATGTAGGCGGTGCTACAGAGTTCTTGAAGTGGT  
9781 GGCCTAACACGGCTACACTAGAAGAACAGTATTTGGTATCTGCGCTCTGCTGAAGCCAG  
9841 TTACCTTCGGAAAAAGAGTTGGTAGCTCTTGATCCGGCAAACAAACCACCGCTGGTAGCG  
9901 GTGGTTTTTTTTGTTTGAAGCAGCAGATTACGCGCAGAAAAAAGGATCTCAAGAAGATC  
9961 CTTTGATCTTTTCTACGGGGTCTGACGCTCAGTGGAACGAAAACCTCACGTTAAGGGATTT  
10021 TGGTCATGAGATTATCAAAAAGGATCTTCCACTAGATCCTTTTAAATTAAAAATGAAGTT  
10081 TTAAATCAATCTAAAGTATATATAGTAAACTTGGTCTGACAGTTACCAATGCTTAATCA  
10141 GTGAGGCACCTATCTCAGCGATCTGTCTATTTGTTTCATCCATAGTTGCCTGACTCCCCG  
10201 TCGTGTAGATAACTACGATACGGGAGGGCTTACCATCTGGCCCCAGTGCTGCAATGATAC  
10261 CGCGAGACCCACGCTCACCGGCTCCAGATTTATCAGCAATAAACCAGCCAGCCGGAAGGG  
10321 CCGAGCGCAGAAGTGGTCCTGCAACTTTATCCGCTCCATCCAGTCTATTAATTGTTGCC  
10381 GGGAAGCTAGAGTAAGTAGTTCGCCAGTTAATAGTTTGCGCAACGTTGTTGCCATTGCTA  
10441 CAGGCATCGTGGTGTACGCTCGTCTGTTGGTATGGCTTCATTTCAGCTCCGTTCCCAAC  
10501 GATCAAGGCGAGTTACATGATCCCCATGTTGTGCAAAAAAGCGGTTAGCTCCTTCGGTC  
10561 CTCCGATCGTTGTGCAAGTAAGTTGGCCGCACTGTTATCACTCATGGTTATGGCAGCAC  
10621 TGCATAATTCCTTACTGTATGCCATCCGTAAGATGCTTTTCTGTGACTGGTGTGACTACT  
10681 CAACCAAGTCATCTGAGAATAGTGTATGCGGCGACCGAGTTGCTCTTGGCCGGCGCTCAA  
10741 TACGGGATAAATACCGGCCACATAGCAGAACTTTAAAAGTGTCTCATCTTGGAAAACGTT  
10801 CTTCCGGGCGAAAACTCAAGGATCTTACCCTGTTGAGATCCAGTTTCGATGTAACCCA  
10861 CTCGTGCACCCAACTGATCTTACGATCTTTTACTTTTACCAGCGTTTTTGGGTGAGCAA  
10921 AAACAGGAAGGCAAAATGCCGCAAAAAGGGAATAAGGGCGACACGGAATGTTGAATAC  
10981 TCATACTCTTCTTTTCAATATTTATGAAGCATTTATCAGGGTTATTGTCTCATGAGCG  
11041 GATACATATTTGAATGTATTTAGAAAAATAAACAAATAGGGGTTCCGCGCACATTTCCCC  
11101 GAAAAGTGCCACCTGAC

2622-3276 bp: CMV promoter  
3348-4064 bp: TALE N-terminus  
4065-6433 bp: ccdB cassette  
6434-6967 bp: TALE C-terminus  
6968-7009 bp: NLS  
7010-7174 bp: VP64  
7181-7243 bp: 2A peptide  
7244-7951 bp: mCherry

## SUPPLEMENTARY METHODS

### *Artificial system for RVD screening*

The artificial screening system was composed of four reporters and a TALE-VP64 expression library in which the RVDs of three consecutive monomers in the middle of an artificial TALE array were encoded by the same 6 randomly synthesized nucleotides (TALE-(XX')<sub>3</sub>). TALE-(XX')<sub>3</sub> contained 14.5 repeats fused with the VP64 trans-activation domain and 2A peptide-linked mCherry. The variable diresidues (XX') for testing were placed in the 7<sup>th</sup> - 9<sup>th</sup> repeat modules, and the variable RVD-carrying TALE modules were purposely designed as triplets to augment the DNA binding capability. X and X' represents the 12<sup>th</sup> and 13<sup>th</sup> amino acids in the 7<sup>th</sup> - 9<sup>th</sup> repeat modules, respectively. Four reporters consist of TALE-(XX')<sub>3</sub> binding sites CTGGCCNNNTACGTA, in which N represents A, T, C or G, was located immediately upstream of a minimal CMV promoter (P<sub>minCMV</sub>) and its downstream EGFP gene. TALE-Ctrl was constructed to have the identical backbone as TALE-(XX')<sub>3</sub> except that its TALE repeats (16.5-mers) are different, not matching with any reporters. The mCherry-normalized EGFP level of TALE-Ctrl co-transfected with reporter served as the corresponding basal level. For each sample, EGFP fluorescence intensity was normalized to mCherry intensity. Fold induction is calculated as the result of normalized sample EGFP intensity divided by normalized basal level shown as follows.



$$\text{Fold Induction} = \frac{(\prod_{i=1}^n \text{Exp}_{\text{EGFP}_i})^{1/n}}{(\prod_{i=1}^n \text{Ctrl}_{\text{EGFP}_i})^{1/n}} \bigg/ \frac{(\prod_{i=1}^n \text{Exp}_{\text{mCherry}_i})^{1/n}}{(\prod_{i=1}^n \text{Ctrl}_{\text{mCherry}_i})^{1/n}}$$

### Notes:

$(\prod_{i=1}^n \text{Exp}_{\text{EGFP}_i})^{1/n}$ : Geometric mean of  $\text{Exp}_{\text{EGFP}}$  of cells from FACS ( $n$  = number of cells)

$\text{Exp}_{\text{EGFP}}$ : EGFP intensity of HEK293T cells co-transfected with TALE-(XX')<sub>m</sub> plus reporter ( $m$  = 3, 6 and 12, corresponding to TALE-(XX')<sub>3</sub>, TALE-(XX')<sub>6</sub> and TALE-(XX')<sub>12</sub>, respectively)

$\text{Exp}_{\text{mCherry}}$ : mCherry intensity of HEK293T cells co-transfected with TALE-(XX')<sub>m</sub> plus reporter

$\text{Ctrl}_{\text{EGFP}}$ : EGFP intensity of HEK293T cells co-transfected with TALE-Ctrl plus reporter

$\text{Ctrl}_{\text{mCherry}}$ : mCherry intensity of HEK293T cells co-transfected with TALE-Ctrl plus reporter

### Construction of the TALE-(XX')<sub>3</sub> library

A 102-nt monomer encoding a standard TALE repeat unit was synthesized with the following sequences: 5'-GCTATGGCTACAACCTGTTTCGGGGGTCAACCCATGAGCCT GACACAGTACTGGGAGCAGGCGCTGCACGGTTTCCAGTGCCTGCTTACCTCCNNNN NNAGAA-3'. The six random nucleotides (underlined Ns) corresponding to the RVD-encoding region were purposely placed near the 3' end to ensure unbiased oligonucleotide synthesis. This single-stranded DNA was cyclized using linker primer 1 (5'-GAACAGGTT GTAGCCATAGCTTCT-3') and T4 DNA ligase (NEB). Using the agarose gel-purified single stranded circular DNA as template, rolling-circle amplification was conducted with phi29 DNA polymerase (NEB) and primer 1 (30°C, 90 min) followed by primer extension using primer 2 (5'-AGGTTGTAGCCATAGCT-3') and phi29 (30°C, 90 min) to acquire long dsDNA. After ultrasonic shearing (270 W, work 10 s, pause 10 s, 10 cycles) and T4 DNA polymerase (NEB) treatment to blunt the ends of the DNA fragments (12°C, 15 min, with 400 μM dNTP mix), 250-400 bp DNA fragments were harvested by gel purification. These DNA fragments were then cloned into a pre-made entry vector using the ligase-independent cloning (LIC) method to create an entry library. BsmBI digestion of entry

library clones produced ~300 bp DNA fragments that were subsequently cloned, via the Golden Gate approach<sup>1</sup>, into a pre-made RVD library vector, which was constructed using the ULtiMATE protocol previously developed by our group<sup>2</sup>. Each plasmid in the final RVD library was verified through sequencing analysis. About 350 kinds of TALE-(XX')<sub>3</sub> constructs were obtained from this approach.

#### *Individual construction of TALE-(XX')<sub>3</sub>*

A complementary primer (5'-aaCGTCTCaGTTTCGGGGGTCAACCCATGAGCCTGACACAGTACTGGGAGCAGGGCGCTGCACGGTTTCCAGTGCCTGCTT-3') and a specific primer (5'-tCGTCTCaGAACAGGTTGTAGCCATAGCTTCTNNNNNNGGAGGTAAGCAGGCACTGGAA-3'; NNNNNN indicates the RVD codons) were annealed and PCR extended to generate a 102 bp monomer with BsmBI sites at each end. The monomer was ligated via a 6 cycles of the Golden Gate method<sup>1</sup> to generate repeats. The repeat product was PCR amplified using the primers G-lib-F (5'-TAGCTATACGTCTCATTGACCCCCGAACAGGTTGTAGCC-3') and G-lib-R (5'-TAGCTATACGTCTCACCCATGAGCCTGACACAGTACTGGGAGCA-3') and Taq Hifi (Transgen, Inc.). The 3-repeat fragment was gel purified and subsequently cloned into a pre-made RVD library vector via the Golden Gate method<sup>1</sup>. Trans1-T1 competent cells (Transgen, Inc.) were used for bacterial transformation. About 50 kinds of TALE-(XX')<sub>3</sub> constructs were obtained from this approach.

#### *Design and construction of TALE-(XX')<sub>6</sub> and TALE-(XX')<sub>12</sub>*

For TALE-(XX')<sub>6</sub>, the customized TALEs (17.5-mer) are the same as TALE-(XX')<sub>3</sub> except that there are six identical repeats containing the variable RVDs. Accordingly, four reporters were constructed, consisting of TALE-(XX')<sub>6</sub> binding sites with six consecutive nucleotides (A, T, C or G) substituted at positions 7 - 12 in front of a minimal CMV promoter and its downstream EGFP gene. The 7<sup>th</sup> - 9<sup>th</sup> repeats in TALE-(XX')<sub>3</sub> were PCR

amplified using the primers G-lib-seq-F (5'-TCTAGGTACCAAGCCCACGGATTGA-3') and G-lib-seq-R (5'-ATCGATCGTCCGGAGTGAGCCCA-3'). The 300 bp PCR product was purified and further PCR amplified using the primers G-lib-F and G-lib-R. The product of the 6-repeat fragment was gel purified and cloned into a pre-made RVD library vector via the Golden Gate method<sup>1</sup> to construct the final TALE-(XX')<sub>6</sub> plasmid.

For TALE-(XX')<sub>12</sub>, the customized TALEs (15.5-mer) contained four ACTC-targeting TALE repeat modules followed by 11.5 repeat units with variable RVDs to be tested. Accordingly, four reporters were constructed, consisting of TALE-(XX')<sub>12</sub> binding sites with 12 consecutive nucleotides (A, T, C or G) substituted at positions 5 - 16 in front of a minimal CMV promoter and its downstream EGFP gene. TALE-(XX')<sub>12</sub> plasmids were constructed with a similar method using TALE-(XX')<sub>6</sub> as a PCR template and applying the ULtiMATE protocol<sup>2</sup>.

|                           |             |
|---------------------------|-------------|
| Backbone plasmid          | 10 ng       |
| 6-repeat fragment         | 5 ng        |
| 10X Tango buffer (Thermo) | 1 µl        |
| 10 mM ATP                 | 1 µl        |
| BsmBI (Thermo)            | 0.75 µl     |
| T4 ligase (NEB)           | 0.25 µl     |
| ddH <sub>2</sub> O        | up to 10 µl |

|      |       |           |
|------|-------|-----------|
| 37°C | 5 min | \         |
|      |       | 10 cycles |
| 16°C | 5 min | /         |
| 37°C | 5 min |           |

#### *Cell culture, transfection and flow cytometric analysis*

HEK293T cells (from Stanley Cohen lab at Stanford University) were cultured in DMEM medium with 10% FBS and 1% penicillin-streptomycin at 37°C and 5% CO<sub>2</sub>. Cells were

seeded 24 h prior to transfection in 24-well plates at a density of  $10^5$  cells per well. The cells in each well were co-transfected with 0.2  $\mu\text{g}$  TALE-(XX')<sub>3</sub> plasmid and 0.4  $\mu\text{g}$  reporter plasmid using polyethylenimine (PEI)<sup>3</sup>. At 48 h post-transfection, the cells were collected and analyzed on a BD LSR II flow cytometer (BD Biosciences). Lasers with wavelengths of 488 nm and 561 nm were used to quantify EGFP and mCherry protein expression, respectively. At least 10,000 events were collected from every sample to obtain sufficient data for analysis. Majority of cells showed mCherry fluorescence intensity of  $5 \times 10^4$  –  $5 \times 10^5$ , thus were gated for further analysis. The binding efficiencies and specificities of the variable RVDs (XX') in each customized TALE were assayed by comparing the fold induction of EGFP reporters with the basal level of EGFP in HEK293T cells transfected with the reporter plasmid and a customized TALE plasmid containing unmatched TALE repeats (Supplementary Sequences). The EGFP fluorescence intensity assayed from FACS analysis was normalized to the corresponding mCherry fluorescence intensity.

#### *Generation of a heat map illustrating the base-preference of RVDs*

The heat map was generated from library screening of TALE-(XX')<sub>3</sub> using four reporters (3A, 3T, 3C, and 3G), thereby reflecting the base preference of 400 RVDs. EGFP activities from different reporters are coded by different colors representing the reporter identities (3A, green; 3T, red; 3C, blue; and 3G, yellow). The brightness of the colors indicates the fold induction of the reporters by TALE-(XX')<sub>3</sub> compared to their basal levels.

#### *Criteria for selection of novel RVDs from TALE-(XX')<sub>3</sub> for intensive study*

The standards are as follows: (1) the highest fold induction among four reporters is at least equal to NK for G recognition; and (2) the second highest fold induction is lower than half of the highest one. In addition to these simple rules, we have also included groups of

RVDs that displayed some unique patterns, i.e. seven RVDs ended with Ala (KA, CA, FA, YA, RA, PA, and AA) that showed preference for T-recognition, and RVDs recognizing both A and G (NN and HN).

### *Statistical analysis*

For comparison between the induction level of TALE-(XX')<sub>12</sub> and the basal level (Fig. 1f), two-sample, one-tailed t-test was performed assuming unequal variance. \* $P < 0.05$ , \*\* $P < 0.01$ , and \*\*\* $P < 0.005$ .

### *Construction of TALENs*

TALENs with natural RVDs (i.e. NI, NG, HD and NN) were constructed using ULtiMATE system as previously described<sup>2</sup>. For TALEN repeats using novel RVDs KN (in place of NN), NH (in place of NN) or RG (in place of NG), TALE monomers containing new RVDs were individually synthesized. The final assembly of these TALENs constructs was conducted using the same ULtiMATE protocol as above.

### *Assessment of TALENs-mediated indels*

HEK293T cells were seeded in 6-well plates at a density of  $3 \times 10^5$  cells per well and incubated at 37°C with 5% CO<sub>2</sub>. For each well, a pair of TALEN plasmids and pmaxGFP (Lonza Group Ltd.) were co-transfected at a ratio of 9:9:2 (0.9 µg : 0.9 µg : 0.2 µg) using PEI method. The transfected cells were cultured at 37°C for one day followed by 3 days of incubation at 30°C (cold shock) before flow cytometric sorting for GFP positive cells. TALENs-targeting regions were PCR-amplified from the genome DNA of the isolated GFP positive cells. The TALENs-mediated indels were analyzed by mismatch-sensitive T7 endonuclease I (T7E1; New England Biolabs) as described previously<sup>4</sup>.
